# Supplementary material for: Multiscale modelling of CO2 hydrogenation of TiO2-supported Ni8 clusters: on the influence of anatase and rutile polymorphs
Source: Royal Society of Chemistry journal article supplement (doi:10.1039/d4cy00586d), 2024-01-01
Supplement: d4cy00586d1.pdf [file d4cy00586d1.pdf]

Supporting Information to:

# **Multiscale modelling of CO<sub>2</sub> Hydrogenation of TiO<sub>2</sub>- supported Ni<sub>8</sub> Clusters: on the Influence of Anatase and Rutile Polymorphs**

Lulu Chen, Ying-Ying Ye, Rozemarijn D.E. Krösschell, Emiel J. M. Hensen, Ivo A. W. Filot \*

Laboratory of Inorganic Materials and Catalysis, Department of Chemical Engineering and Chemistry,  
Eindhoven University of Technology, P.O. Box 513, 5600 MB Eindhoven, the Netherlands

\*Corresponding author.

Email:

[i.a.w.filot@tue.nl](mailto:i.a.w.filot@tue.nl) (I.A.W. Filot)

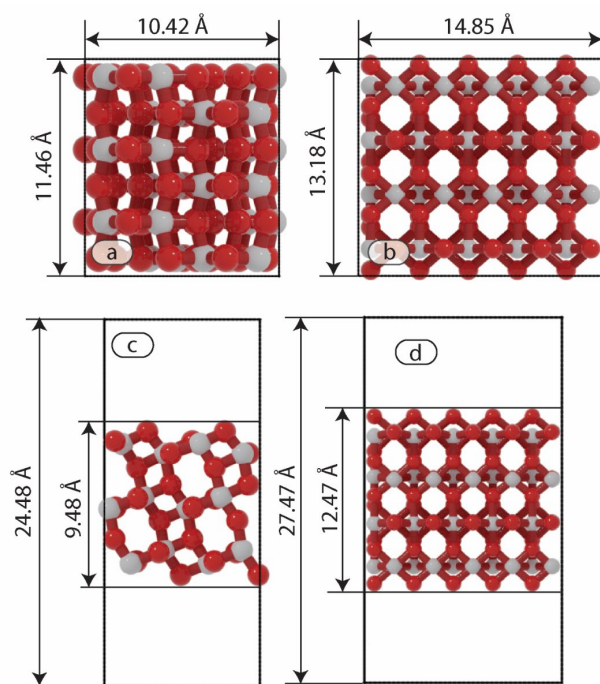

Figure S1. Surface models of  $\text{TiO}_2\text{-a}(101)$  and  $\text{TiO}_2\text{-r}(110)$ . (a): the top view of  $\text{TiO}_2\text{-a}(101)$ ; (b): the top view of  $\text{TiO}_2\text{-r}(110)$ ; (c): the side view of  $\text{TiO}_2\text{-a}(101)$ ; (d): the side view of  $\text{TiO}_2\text{-r}(110)$ . Color scheme: light gray: Ti; red: O. To enhance the visualization of the Ti atoms, the O atoms are displayed at a smaller size.

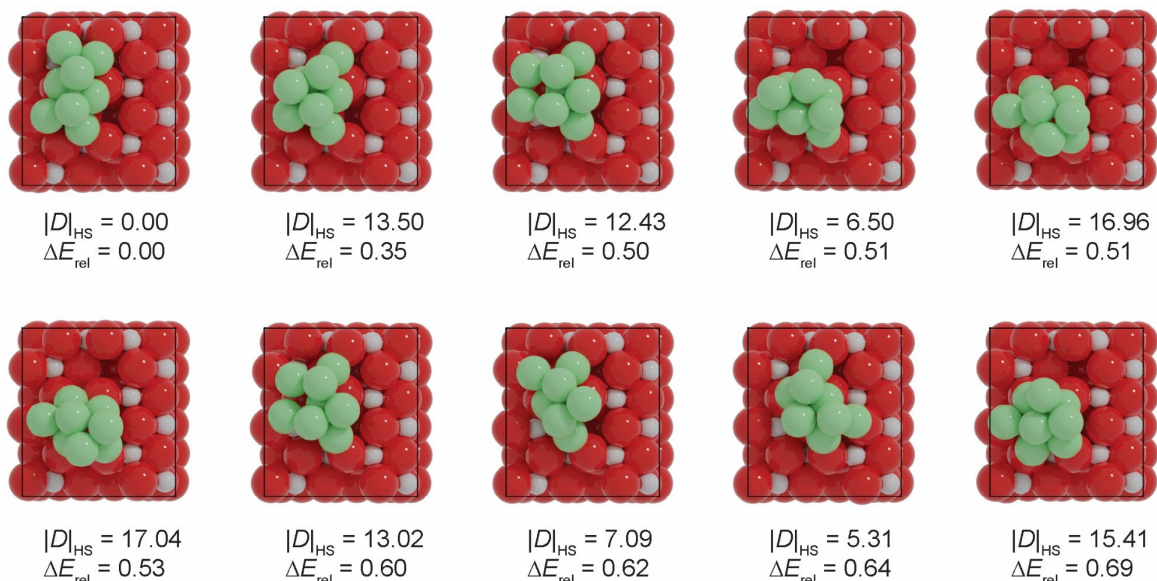

Figure S2. Ten most stable structures of Ni<sub>8</sub>/TiO<sub>2</sub>-a. The energy of each structure relative to the most stable structure is shown as  $\Delta E_{\text{rel}}$  (measured in electron volts, eV). The similarity is indicated as the Hilbert-Schmidt norm ( $|D|_{\text{HS}}$ ).

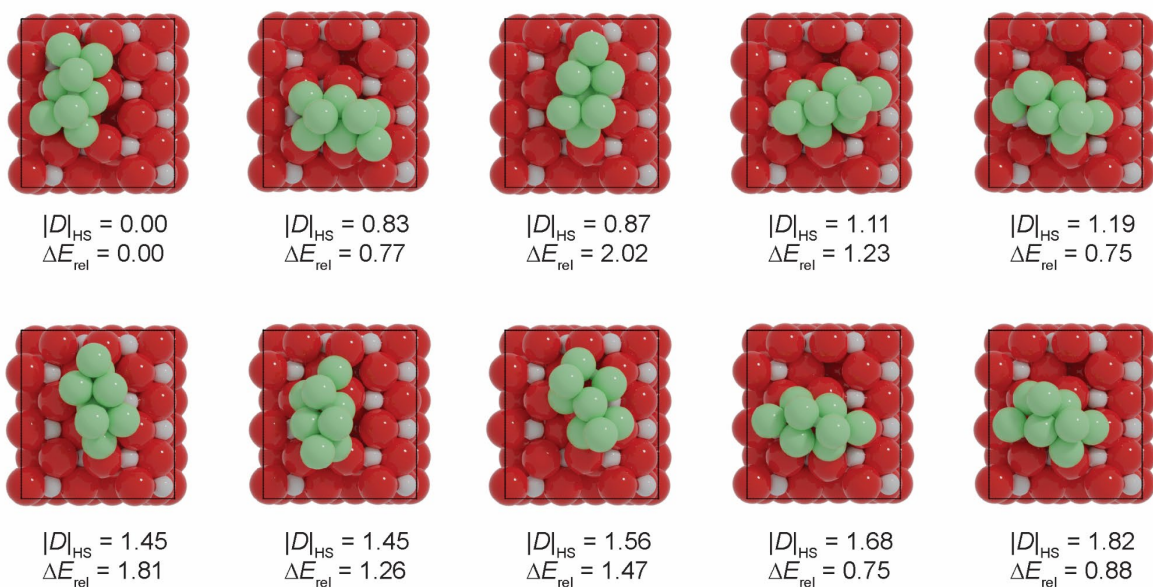

Figure S3. Comparisons of ten most similar structures of Ni<sub>8</sub>/TiO<sub>2</sub>-a with respect to the most stable structure. The similarity is indicated as the Hilbert-Schmidt norm ( $|D|_{\text{HS}}$ ). The energy of each structure relative to the most stable structure is shown as  $\Delta E_{\text{rel}}$  (measured in electron volts, eV).

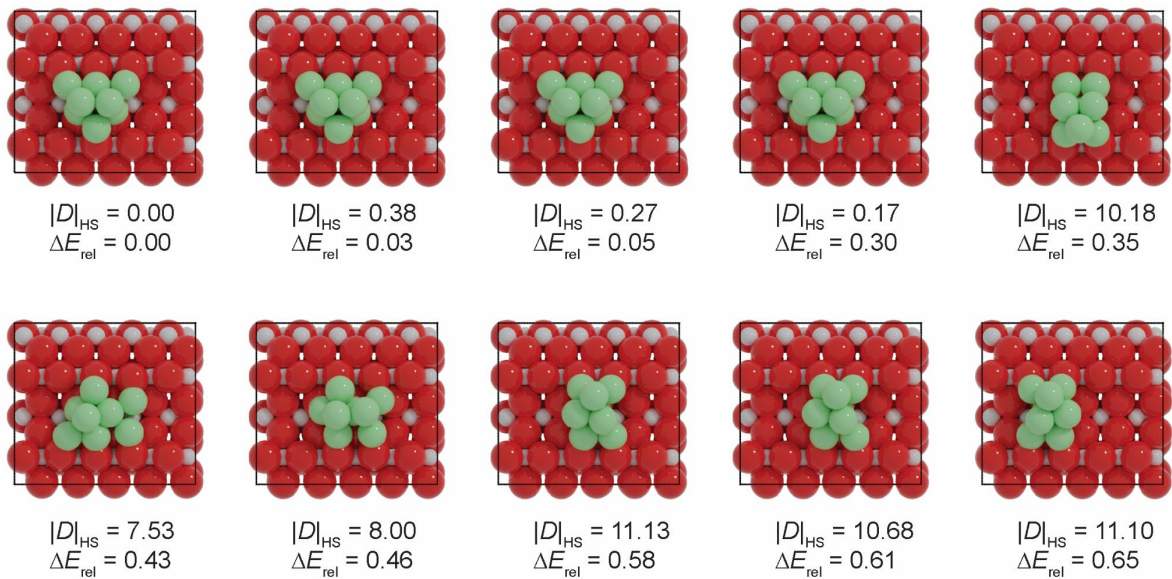

Figure S4. Ten most stable structures of  $\text{Ni}_8/\text{TiO}_2\text{-r}$ . The energy of each structure relative to the most stable structure is shown as  $\Delta E_{\text{rel}}$  (measured in electron volts, eV). The similarity is indicated as the Hilbert-Schmidt norm ( $|D|_{\text{HS}}$ ).

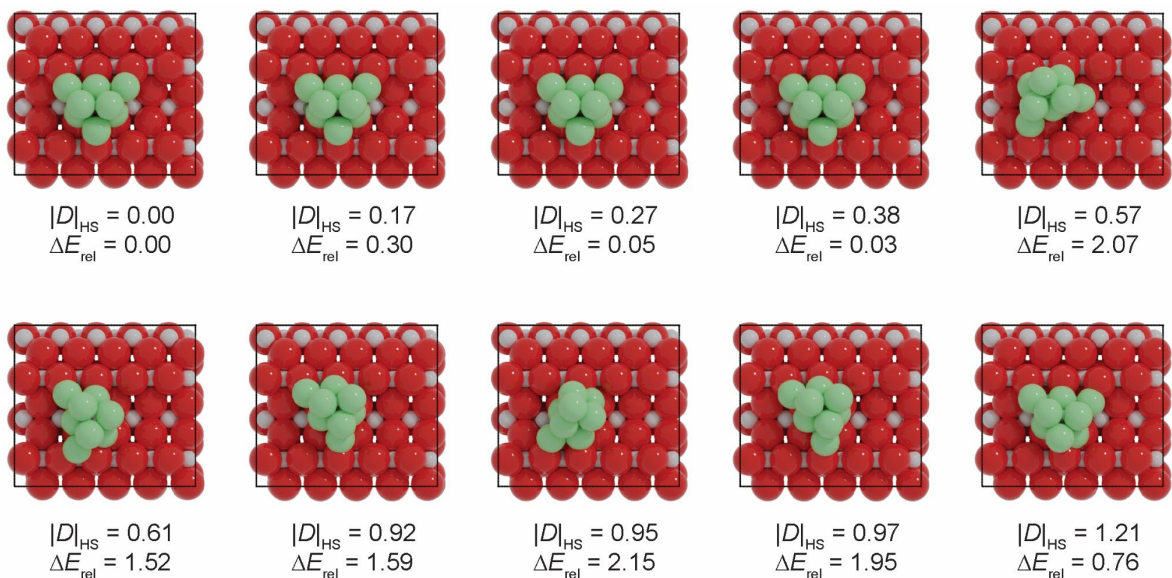

Figure S5. Comparisons of ten most similar structures of  $\text{Ni}_8/\text{TiO}_2\text{-a}$  with respect to the most stable structure. The similarity is indicated as the Hilbert-Schmidt norm ( $|D|_{\text{HS}}$ ). The energy of each structure relative to the most stable structure is shown as  $\Delta E_{\text{rel}}$  (measured in electron volts, eV).

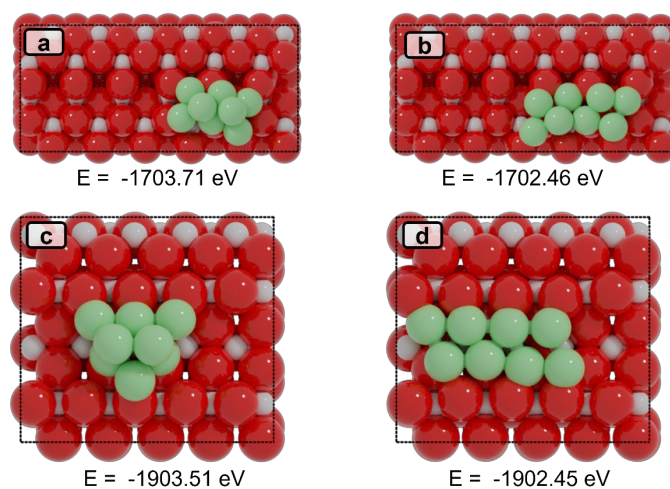

Figure S6. The configurations of 3D-Ni<sub>8</sub> clusters and falt Ni<sub>8</sub> clusters deposited on TiO<sub>2</sub> anatase (a and b) and rutile (c and d).

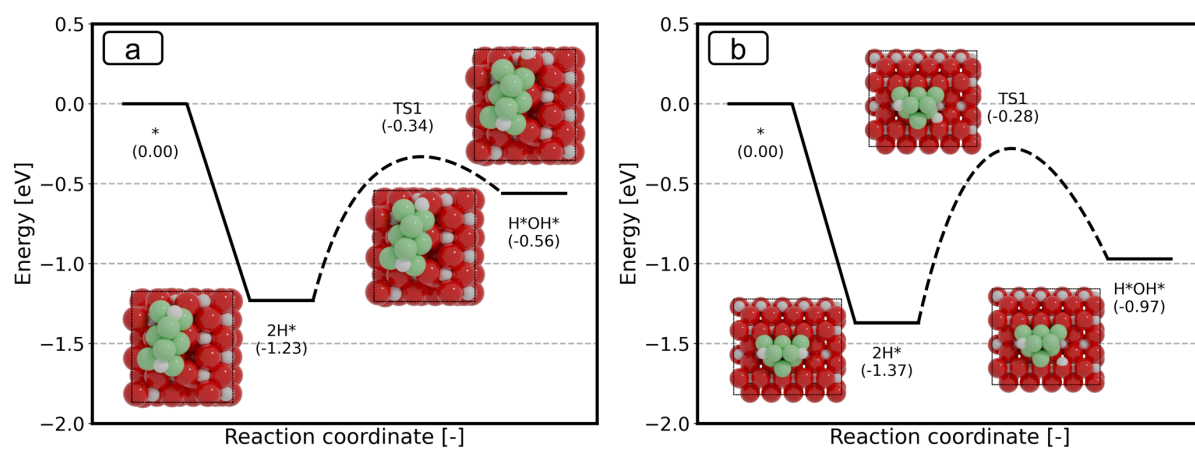

Figure S7. The energy diagrams of H spillover on Ni<sub>8</sub>/TiO<sub>2</sub>-a (a) and Ni<sub>8</sub>/TiO<sub>2</sub>-r (b).

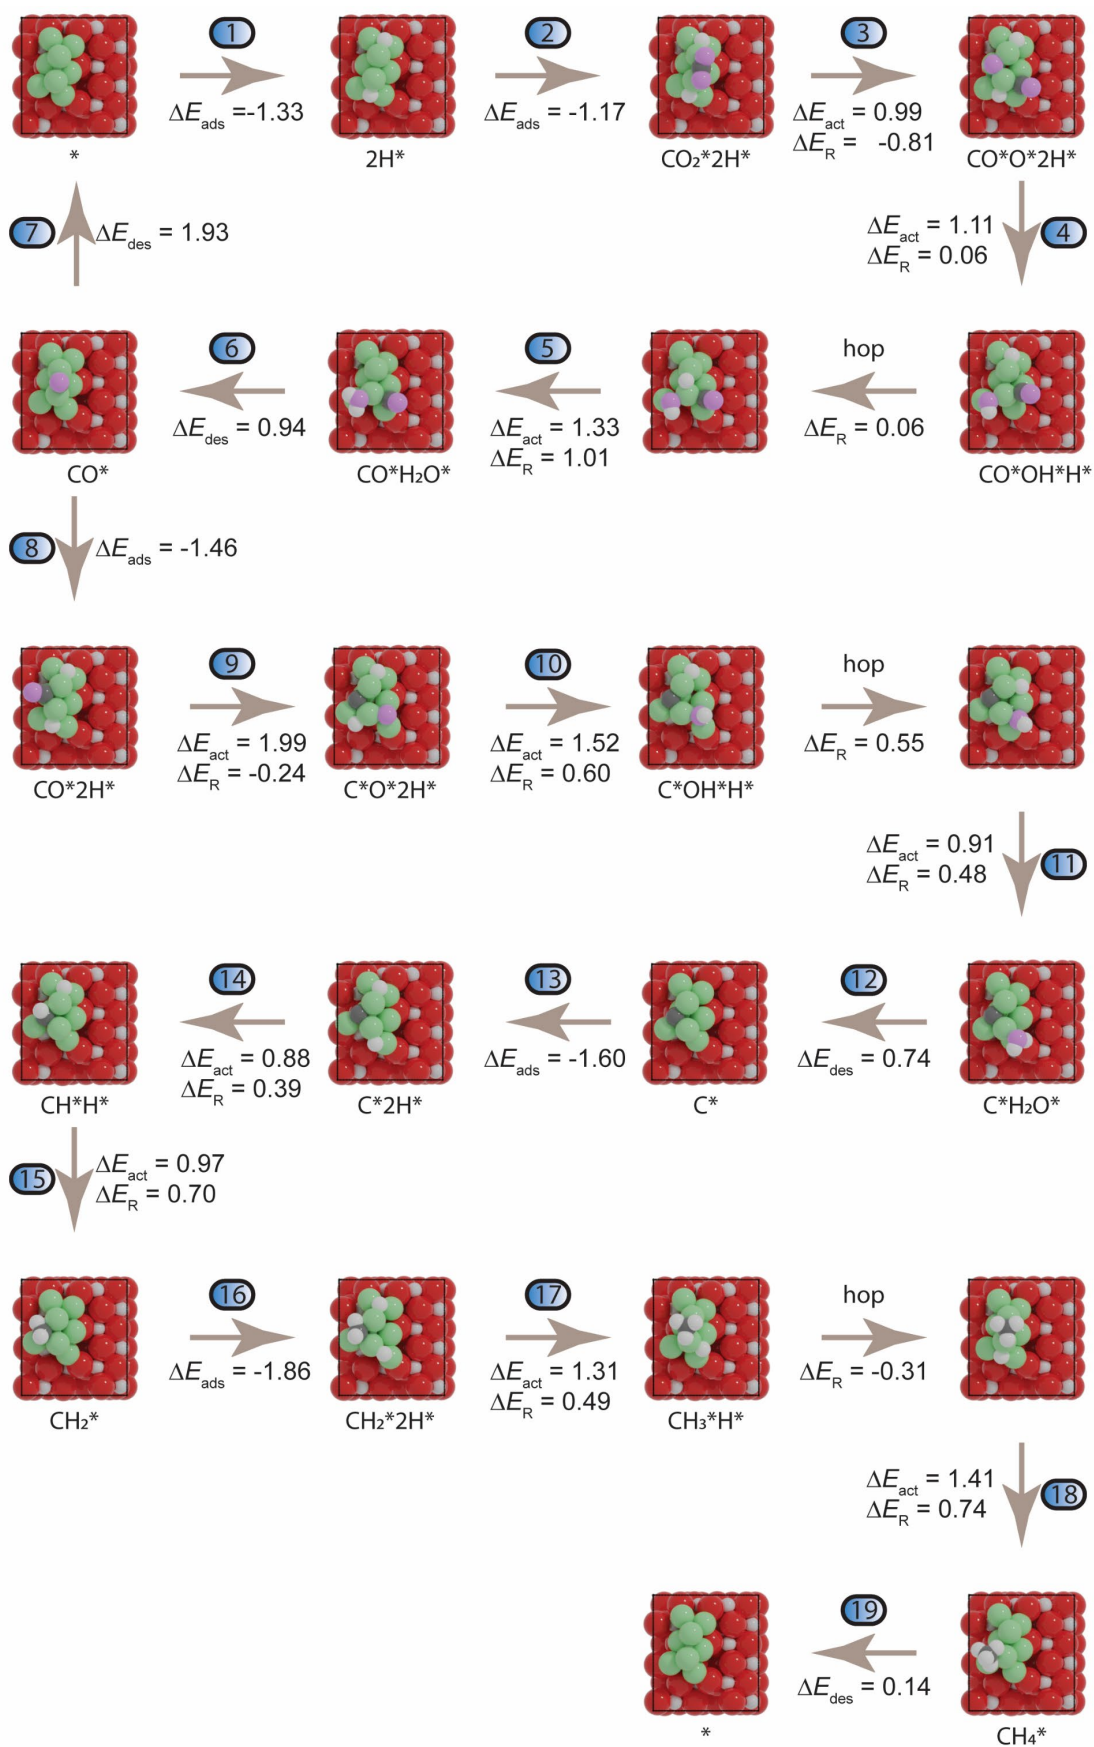

Figure S8. Configurations of CO<sub>2</sub> methanation on Ni<sub>8</sub>/TiO<sub>2</sub>-a via CH<sub>x</sub> intermediates. Color scheme: Light gray: Ti; Red: O in support; Green: Ni; Dark gray: C; Pink: O in CO<sub>2</sub>; White: H.

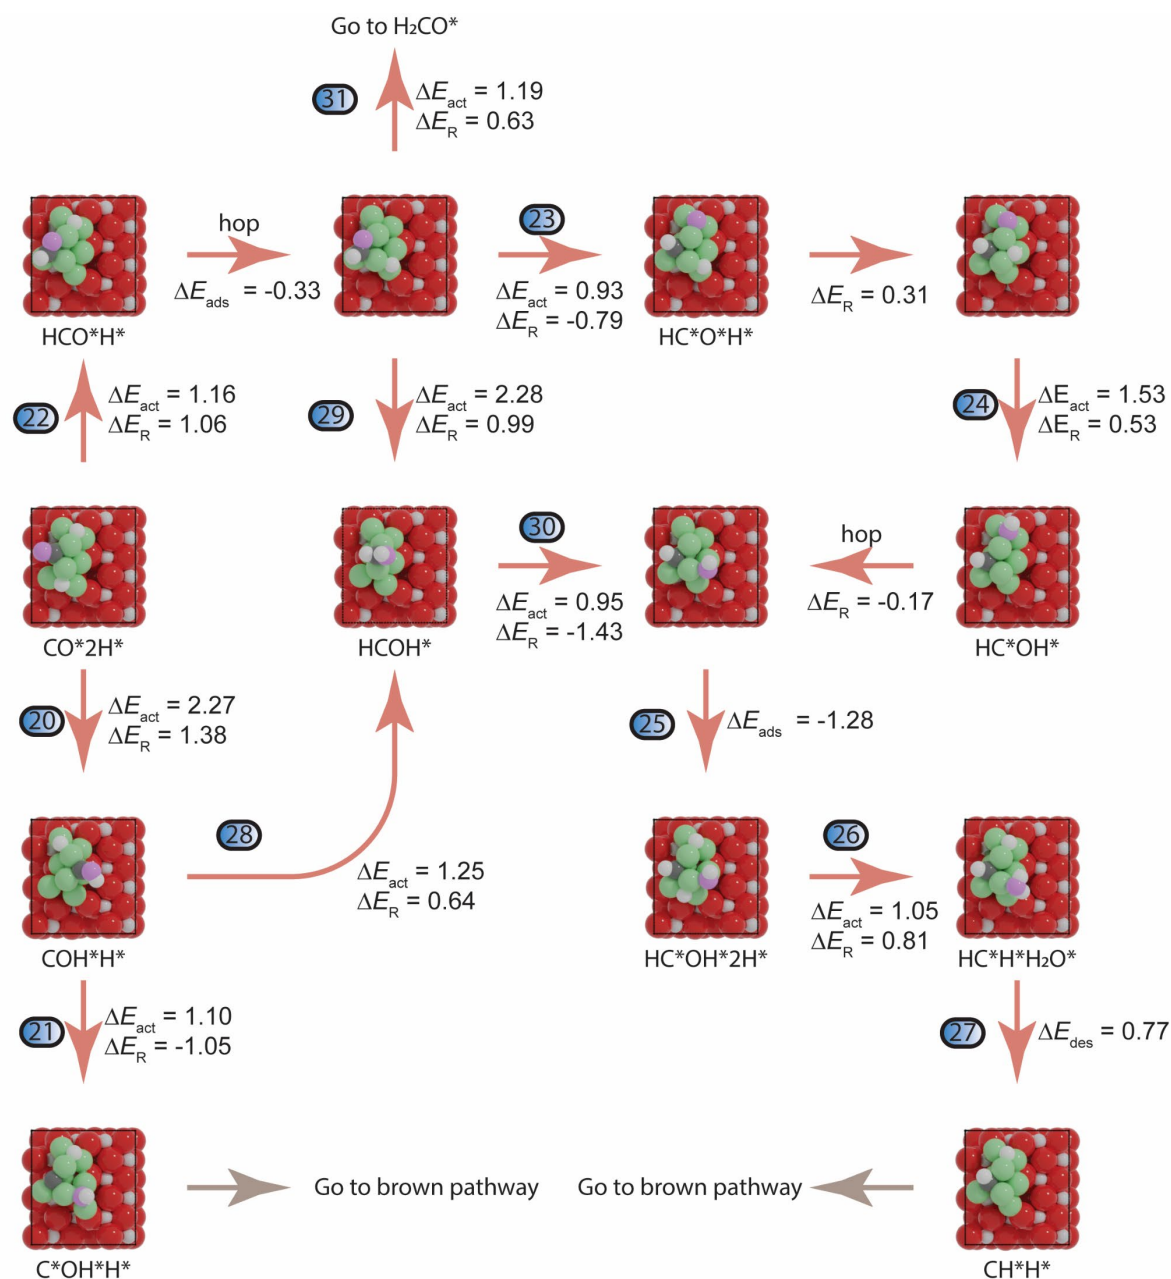

Figure S9. Configurations of CO<sub>2</sub> methanation on Ni<sub>8</sub>/TiO<sub>2</sub>-a via HCO\*, COH\* and HCOH\* intermediates. Color scheme: Light gray: Ti; Red: O in support; Green: Ni; Dark gray: C; Pink: O in CO<sub>2</sub>; White: H.

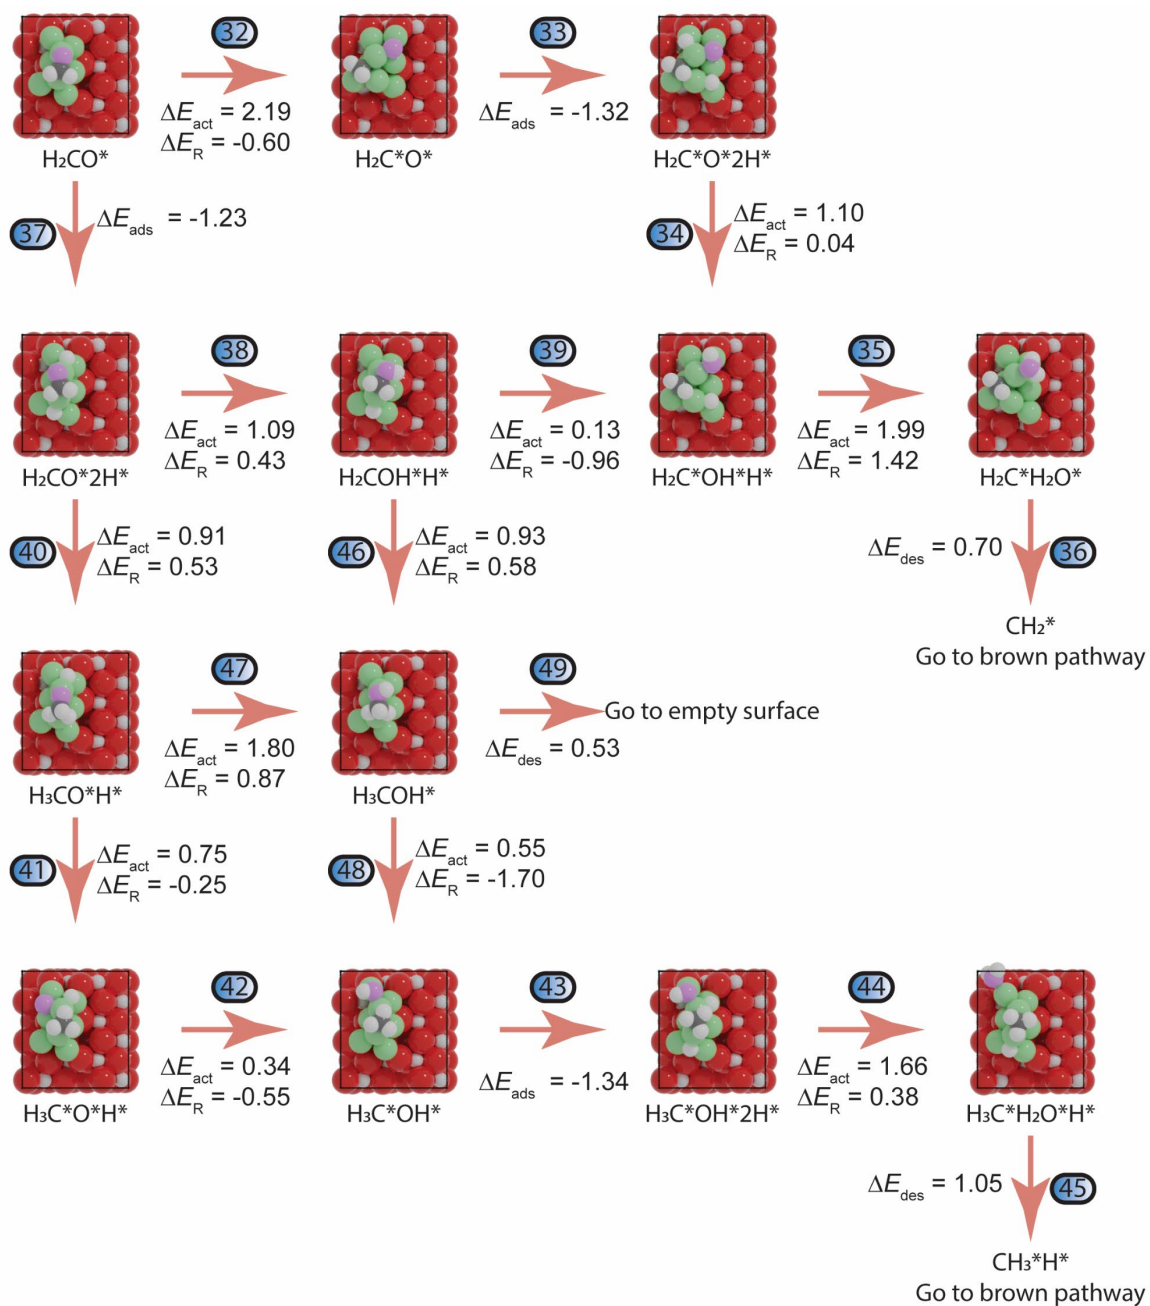

Figure S10. Configurations of CO<sub>2</sub> methanation on Ni<sub>3</sub>/TiO<sub>2</sub>-a via H<sub>2</sub>CO\*, H<sub>3</sub>CO\*, H<sub>2</sub>COH\* and H<sub>3</sub>COH\* intermediates. Color scheme: Light gray: Ti; Red: O in support; Green: Ni; Dark gray: C; Pink: O in CO<sub>2</sub>; White: H.





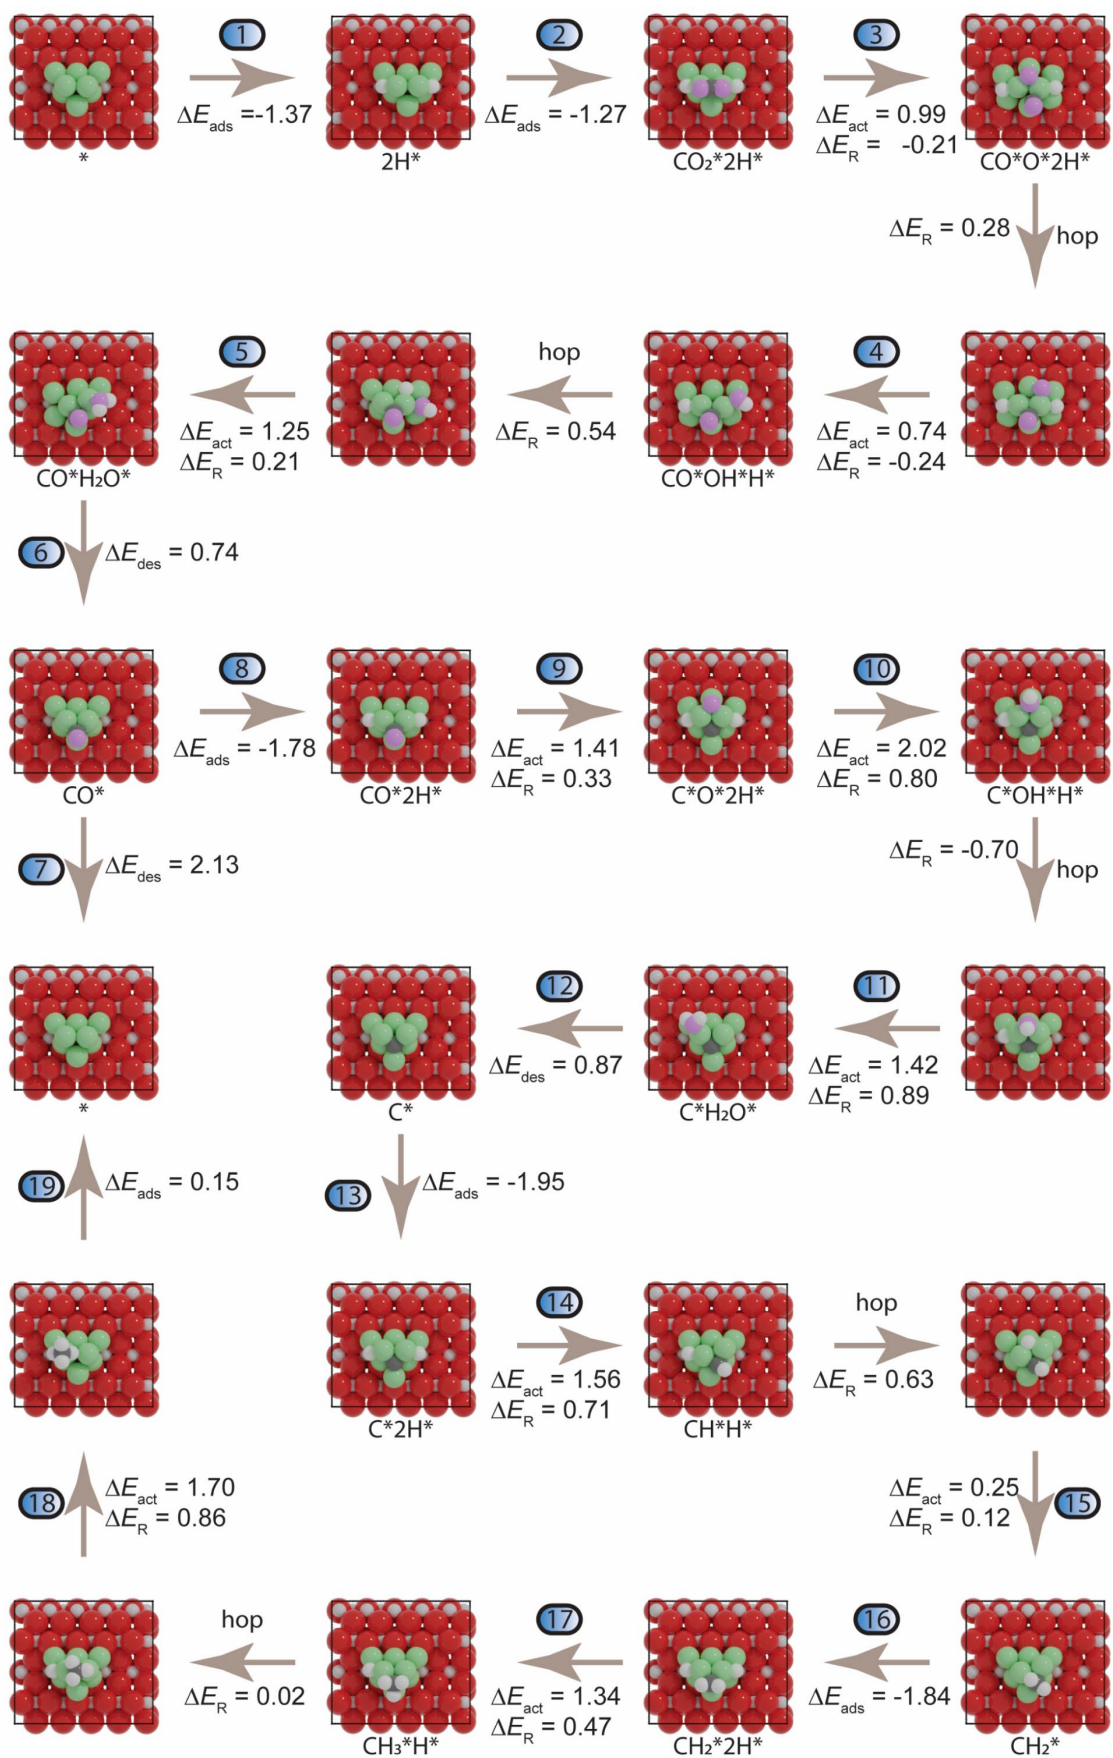

Figure S12. Configurations of CO<sub>2</sub> methanation on Ni<sub>8</sub>/TiO<sub>2</sub>-r via CH<sub>x</sub> intermediates. Color scheme: Light gray: Ti; Red: O in support; Green: Ni; Dark gray: C; Pink: O in CO<sub>2</sub>; White: H.

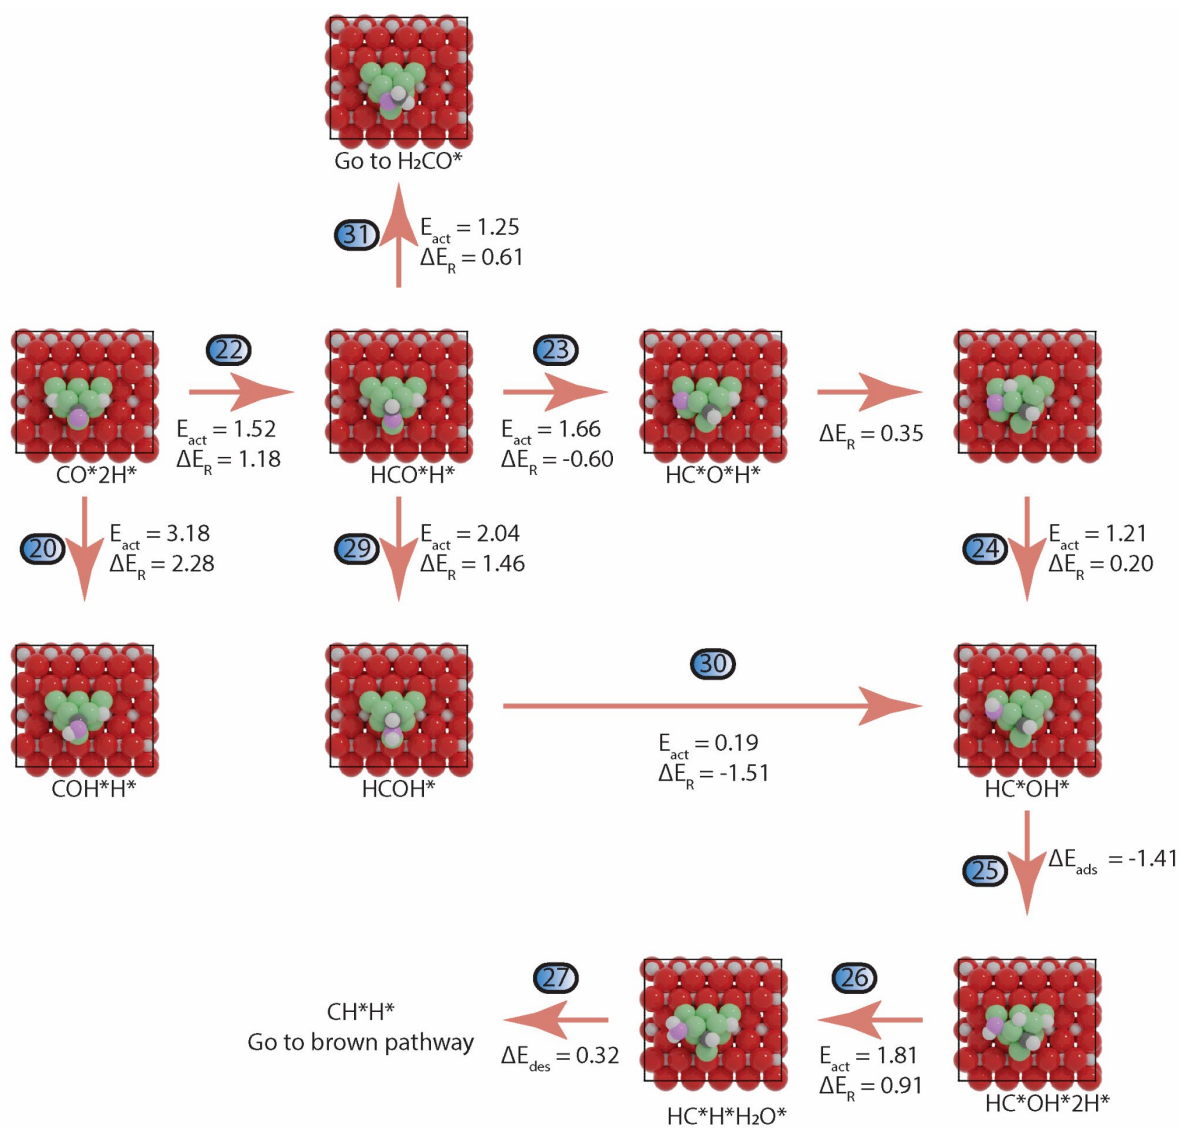

Figure S13. Configurations of H-assisted CO dissociation mechanisms on  $\text{Ni}_8/\text{TiO}_2\text{-r}$  via  $\text{HCO}^*$  and  $\text{HCOH}^*$  species. Color scheme: Light gray: Ti; Red: O in support; Green: Ni; Dark gray: C; Pink: O in  $\text{CO}_2$ ; White: H.

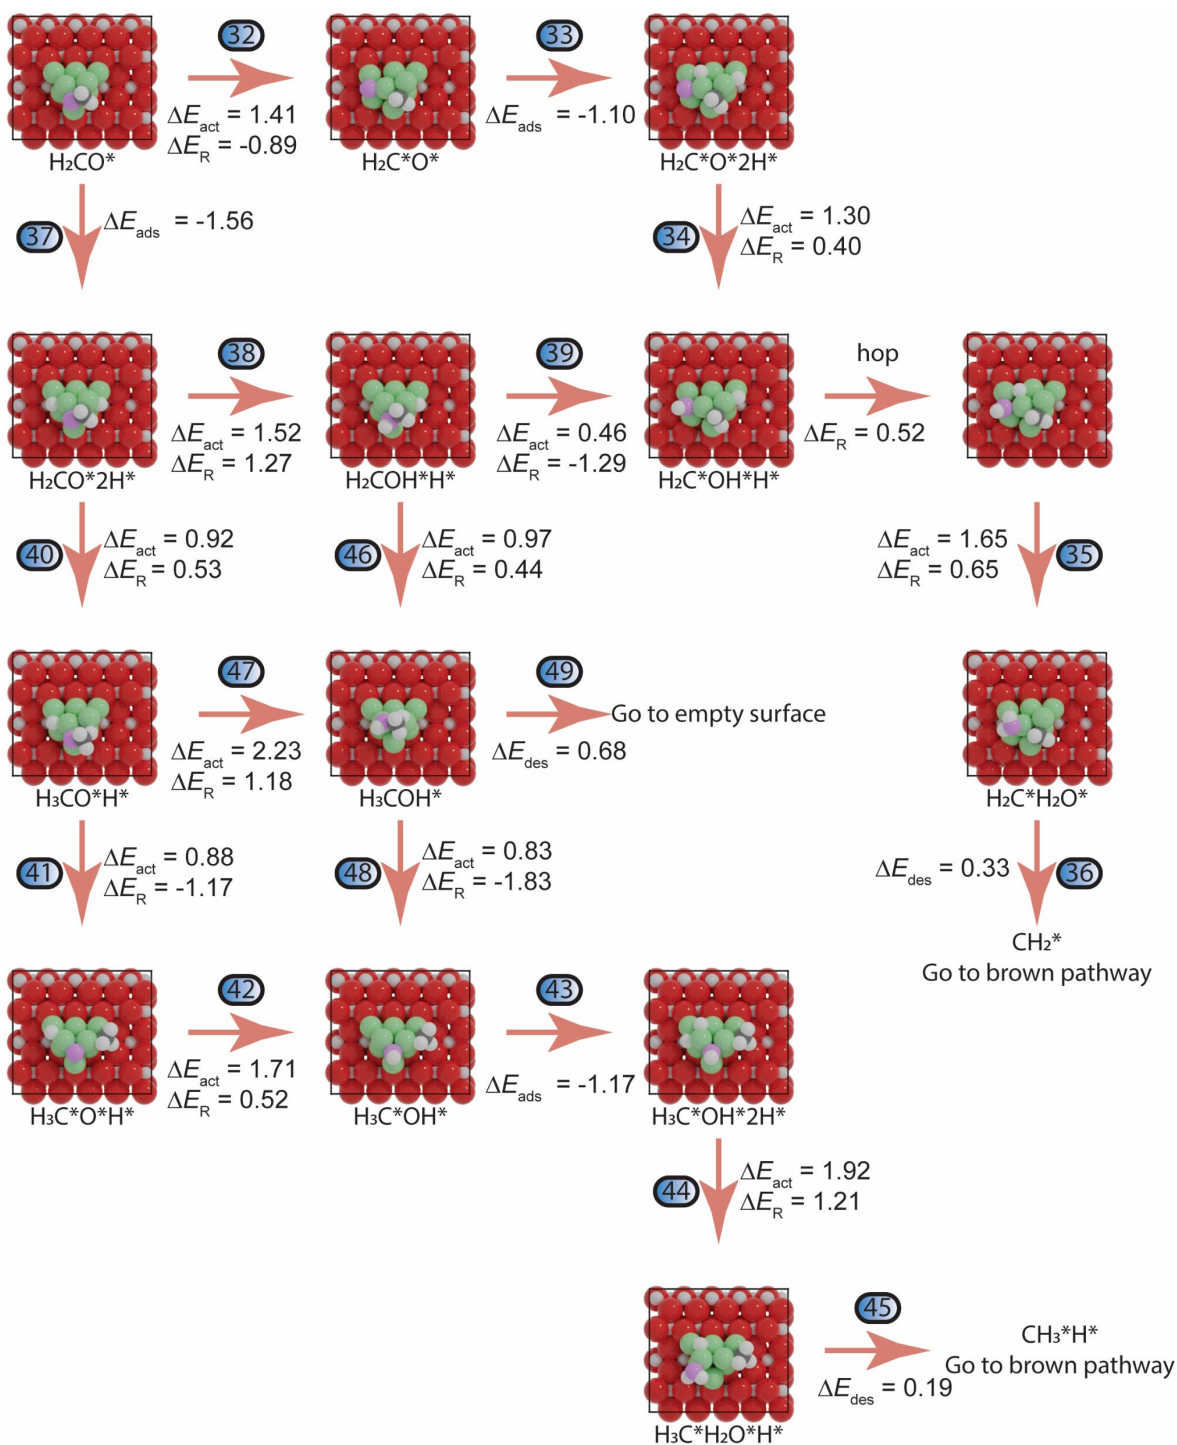

Figure S14. Configurations of H-assisted CO dissociation mechanisms on Ni<sub>8</sub>/TiO<sub>2</sub>-r via H<sub>2</sub>CO\*, H<sub>2</sub>COH\*, H<sub>3</sub>CO\* and H<sub>3</sub>COH\* species. Color scheme: Light gray: Ti; Red: O in support; Green: Ni; Dark gray: C; Pink: O in CO<sub>2</sub>; White: H.

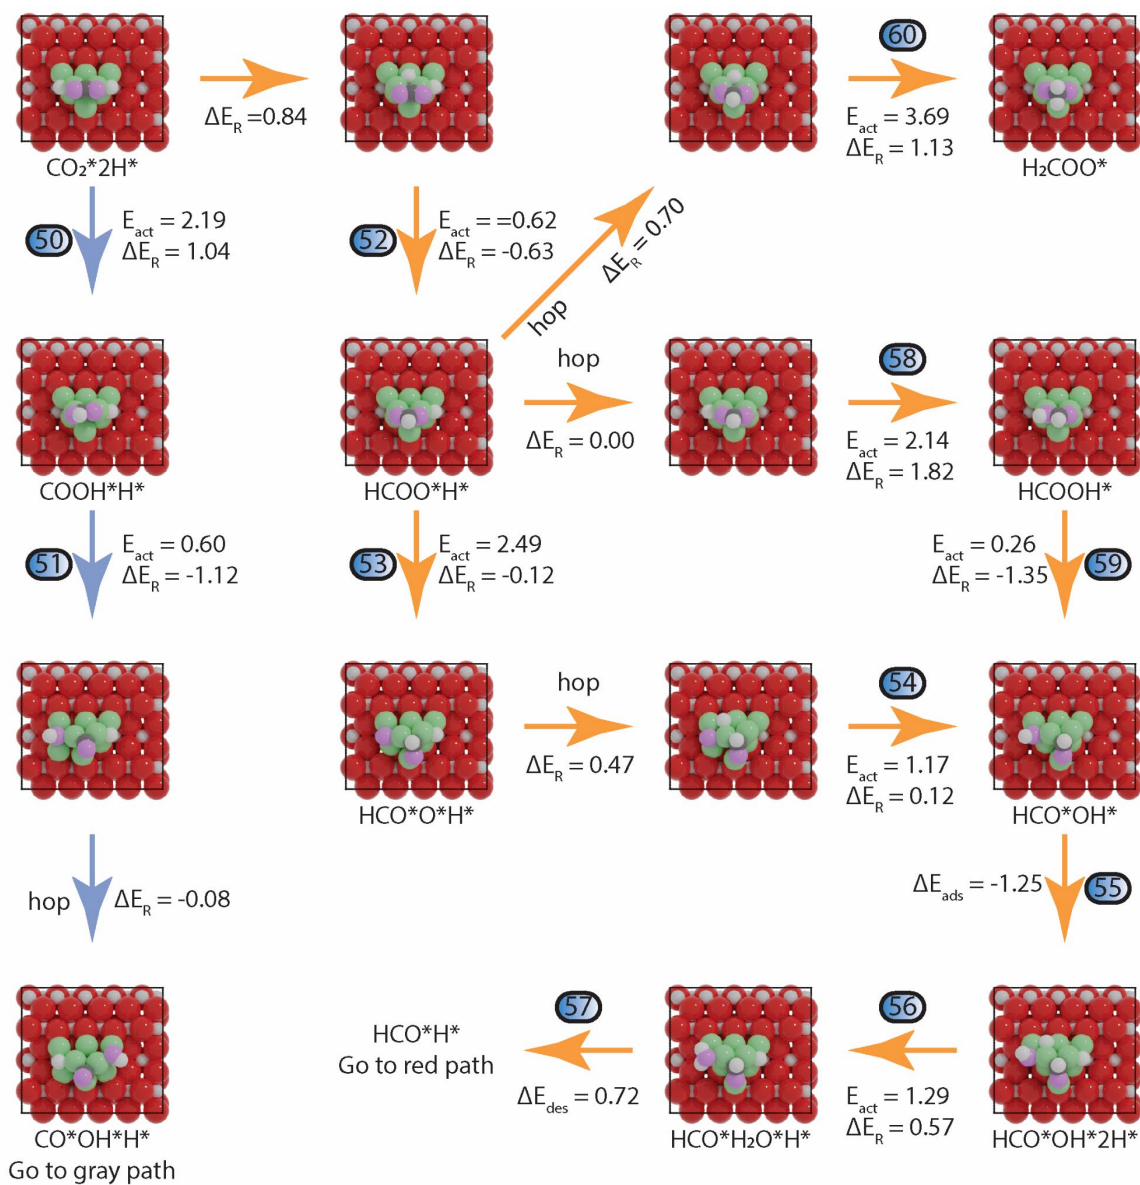

Figure S15. Configurations of H-assisted CO<sub>2</sub> dissociation mechanisms on Ni<sub>8</sub>/TiO<sub>2</sub>-r via H<sub>x</sub>COO\* intermediates. Color scheme: Light gray: Ti; Red: O in support; Green: Ni; Dark gray: C; Pink: O in CO<sub>2</sub>; White: H.

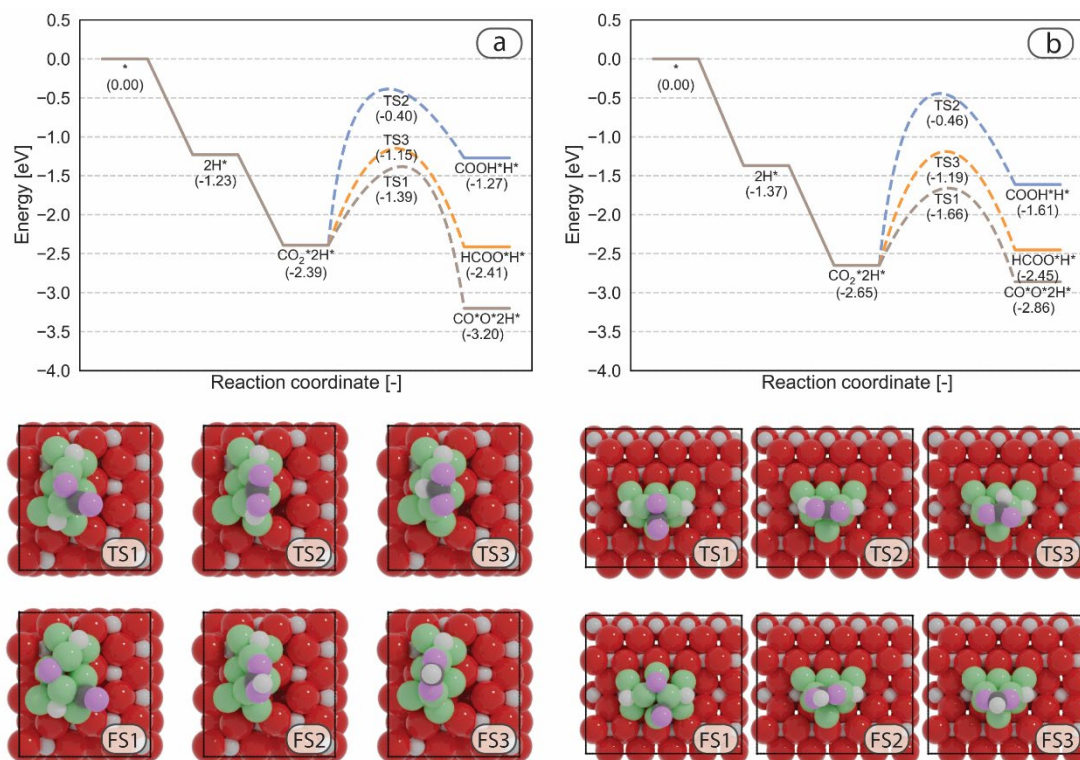

Figure S16. Reaction energy diagram of CO<sub>2</sub> activation on (a) Ni<sub>8</sub>/TiO<sub>2</sub>-a and (b) Ni<sub>8</sub>/TiO<sub>2</sub>-r. Direct CO<sub>2</sub> dissociation, COOH formation and HCOO formation are shown with brown, blue and orange lines, respectively. The corresponding configurations of transition states and final states are displayed below the energy diagram. TS1 and FS1 correspond to the transition state and final state of CO<sub>2</sub> direct dissociation. TS2 and FS2 represent the transition state and final state of COOH formation. TS3 and FS3 denote the transition state and final state of HCOO formation.

## Section S1: Pathway Involving $H_xCO_2$ Intermediates for $Ni_8/TiO_2$ -anatase

The final part of the kinetic network, corresponding to the blue and orange section in Figure 5, branches out from the direct  $CO_2$  dissociation pathway (between R2 and R3) and pertains to the elementary reaction steps involving  $H_xCO_2$  intermediates. The activation and reaction energy for  $COOH^*$  formation from  $CO_2$  (R50) is  $\Delta E_{act} = 1.98$  eV and  $\Delta E_R = 1.12$  eV, respectively.  $COOH^*$  decomposes into  $CO^*$  and  $OH^*$  (R51) which is the same as  $CO^*OH^*H^*$  in the  $CH_x$  intermediates pathway. The dissociation of  $COOH^*$  needs to overcome an activation energy of 0.69 eV and this step is exothermic by 1.66 eV. The pathway from  $CO_2^*2H^*$  to  $CO^*OH^*H^*$  through the direct  $CO_2$  dissociation has an activation energy of 1.11 eV, whereas the  $COOH^*$  pathway exhibits a higher activation energy of 1.98 eV.

To obtain  $HCOO^*$ ,  $H^*$  first migrates from  $H_{1-6-7}$  to  $H_{1-2-7}$  site ( $\Delta E_R = 0.39$  eV) such that H gets close to the C atom in adsorbed  $CO_2$ . Next,  $HCOO^*$  formation is exothermic by 0.41 eV overcoming an activation energy of 0.85 eV. Including the energy for H migration, the overall activation and reaction energies for  $HCOO^*$  formation (R52) is  $\Delta E_{act} = 1.24$  eV and  $\Delta E_R = -0.02$  eV, respectively.

$HCOO^*H^*$  can either dissociate in  $HCO^*O^*H^*$  (R53,  $\Delta E_{act} = 2.80$  eV,  $\Delta E_R = -0.15$  eV), or become hydrogenated to form  $HCOOH^*$  (R58,  $\Delta E_{act} = 2.08$  eV,  $\Delta E_R = 1.87$  eV) or  $H_2COO^*$  (R60,  $\Delta E_{act} = 2.74$  eV,  $\Delta E_R = 1.47$  eV). The dissociated  $O^*$  in  $HCO^*O^*H^*$  reacts with  $H^*$  forming an  $OH^*$  (R54) with an activation energy of 1.77 eV and a reaction energy of 0.82 eV. The  $OH^*$  species can also be obtained through the dissociation of  $HCOOH^*$  (R59,  $\Delta E_{act} = 1.43$  eV,  $\Delta E_R = -1.21$  eV). The  $OH^*$  is then hydrogenated to  $H_2O^*$  in the presence of  $H^*$ , which is provided by the adsorption of  $H_2$  (R55,  $\Delta E_{ads} = -1.16$  eV). The subsequent formation of  $H_2O^*$  (R56) is endothermic by 0.73 eV overcoming an activation energy of 0.86 eV. The desorption of  $H_2O$  (R57) generates the same configuration of  $HCO^*H^*$  in the H-assisted CO dissociation mechanism with a desorption energy of 0.33 eV.

The dissociation of  $H_2COO^*$  results in the formation of  $H_2CO^*$  and  $O^*$  (R61) with an activation energy of 1.48 eV and an exothermic reaction energy of 1.09 eV. The adsorption of  $H_2$  on this surface is exothermic by -0.93 eV (R62). The  $O^*$  subsequently reacts with these two  $H^*$  forming  $OH^*$  (R63,  $\Delta E_{act} = 2.02$  eV,  $\Delta E_R = 0.30$  eV) and  $H_2O^*$  (R64,  $\Delta E_{act} = 1.80$  eV,  $\Delta E_R = 1.32$  eV). Finally,  $H_2O$  desorbs leaving only  $H_2CO^*$  on the cluster (R65,  $\Delta E_{des} = 0.11$  eV), which is the same as the  $H_2CO^*$  species in the H-assisted CO dissociation pathway.

## Section S2: Pathway Involving $H_xCO_2$ Intermediates for $Ni_8/TiO_2$ -rutile

The last section involves H-assisted  $CO_2$  dissociation via  $H_xCO_2$  intermediates as depicted by the blue and orange section in Figure 6. Hydrogenation of  $CO_2$  leads to formation of  $COOH^*$  (R50,  $\Delta E_{act} = 2.19$  eV,  $\Delta E_R = 1.04$  eV) or  $HCOO^*$  (R52,  $\Delta E_{act} = 1.46$  eV,  $\Delta E_R = -0.20$  eV).  $COOH^*$  can dissociate to yield  $CO^*$  and  $OH^*$  (R51,  $\Delta E_{act} = 0.60$  eV,  $\Delta E_R = -1.04$  eV), which are located at  $B_{7-8}$  and  $H_{1-4-7}$  sites, respectively. This configuration closely resembles the  $CO^*OH^*H^*$  intermediate in the  $CH_x$ -intermediates pathway, with a negligible energy difference of  $-0.08$  eV. Dissociation of  $HCOO^*$  generates  $HCO^*$  and  $O^*$  (R53,  $\Delta E_{act} = 2.49$  eV,  $\Delta E_R = -0.12$  eV), resulting in the presence of  $HCO^*$ ,  $O^*$  and  $H^*$  on the surface. The  $H^*$  migrates from  $H_{1-4-7}$  to  $H_{2-7-8}$  ( $\Delta E_R = 0.47$  eV), followed by a reaction between  $O^*$  and  $H^*$  to generate  $OH^*$  (R54,  $\Delta E_{act} = 1.17$  eV,  $\Delta E_R = 0.12$  eV). This configuration can alternatively be obtained through the formation (R58,  $\Delta E_{act} = 2.14$  eV,  $\Delta E_R = 1.82$  eV) and dissociation of  $HCOOH^*$  (R59,  $\Delta E_{act} = 0.26$  eV,  $\Delta E_R = -1.35$  eV). After adsorption of  $H_2$  (R55,  $\Delta E_{ads} = -1.25$  eV),  $OH^*$  can be hydrogenated to form  $H_2O^*$  (R56,  $\Delta E_{act} = 1.29$  eV,  $\Delta E_R = 0.57$  eV) which can desorb with an associated desorption energy of  $0.72$  eV, leaving  $HCO^*H^*$  on the surface and linking back to the red segment of the kinetic network. Finally, the hydrogenation of  $HCOO^*$  to  $H_2COO^*$  (R60) requires an activation energy of  $4.39$  eV including the migration of  $H^*$ . We consider this barrier to be prohibitively large and therefore did not consider the subsequent  $H_2COO^*$  dissociation and  $O^*$  hydrogenation.



Table S1. Activation energies of CO<sub>2</sub> methanation on Ni<sub>8</sub>/TiO<sub>2</sub>-a and Ni<sub>8</sub>/TiO<sub>2</sub>-r. The reaction numbers are the same as in Figure 4 and Figure 7. The values are given in eV.

| No.                                                          | Elementary reaction                                                           | Ni <sub>8</sub> /TiO <sub>2</sub> anatase (101) |                                   | Ni <sub>8</sub> /TiO <sub>2</sub> rutile (110) |                                   |
|--------------------------------------------------------------|-------------------------------------------------------------------------------|-------------------------------------------------|-----------------------------------|------------------------------------------------|-----------------------------------|
|                                                              |                                                                               | $\Delta E_{\text{act, forward}}$                | $\Delta E_{\text{act, backward}}$ | $\Delta E_{\text{act, forward}}$               | $\Delta E_{\text{act, backward}}$ |
| <b>CO<sub>2</sub>* → CO* → C* → CH<sub>4</sub></b>           |                                                                               |                                                 |                                   |                                                |                                   |
| R1                                                           | H <sub>2</sub> + * ↔ 2H**                                                     | 0                                               | 1.23                              | 0                                              | 1.37                              |
| R2                                                           | CO <sub>2</sub> + 2H* ↔ CO <sub>2</sub> *2H*                                  | 0                                               | 1.16                              | 0                                              | 1.27                              |
| R3                                                           | CO <sub>2</sub> *2H* ↔ CO*O*2H*                                               | 0.99                                            | 1.80                              | 0.99                                           | 1.20                              |
| R4                                                           | CO*O*2H* ↔ CO*OH*H*                                                           | 1.40                                            | 1.34                              | 1.03                                           | 0.98                              |
| R5                                                           | CO*OH*H* ↔ CO*H <sub>2</sub> O*                                               | 1.39                                            | 0.31                              | 1.79                                           | 1.04                              |
| R6                                                           | H <sub>2</sub> O + CO* ↔ CO*H <sub>2</sub> O*                                 | 0                                               | 0.94                              | 0                                              | 0.74                              |
| R7                                                           | CO + * ↔ CO*                                                                  | 0                                               | 1.93                              | 0                                              | 2.13                              |
| R8                                                           | CO* + H <sub>2</sub> ↔ CO*2H*                                                 | 0                                               | 1.46                              | 0                                              | 1.78                              |
| R9                                                           | CO*2H* ↔ C*O*2H*                                                              | 1.99                                            | 2.23                              | 1.41                                           | 1.08                              |
| R10                                                          | C*O*2H* ↔ C*OH*H*                                                             | 1.52                                            | 0.92                              | 2.02                                           | 1.92                              |
| R11                                                          | C*OH*H* ↔ C*H <sub>2</sub> O*                                                 | 1.46                                            | 0.43                              | 1.42                                           | 0.53                              |
| R12                                                          | H <sub>2</sub> O + C* ↔ C*H <sub>2</sub> O*                                   | 0                                               | 0.74                              | 0                                              | 0.87                              |
| R13                                                          | H <sub>2</sub> + C* ↔ C*2H*                                                   | 0                                               | 1.60                              | 0                                              | 1.95                              |
| R14                                                          | C*H <sub>2</sub> * ↔ CH*H*                                                    | 0.88                                            | 0.49                              | 1.56                                           | 0.85                              |
| R15                                                          | CH*H* ↔ CH <sub>2</sub> *                                                     | 0.97                                            | 0.27                              | 0.85                                           | 0.13                              |
| R16                                                          | H <sub>2</sub> * + CH <sub>2</sub> * ↔ CH <sub>2</sub> *2H*                   | 0                                               | 1.86                              | 0                                              | 1.84                              |
| R17                                                          | CH <sub>2</sub> *2H* ↔ CH <sub>3</sub> *H*                                    | 1.31                                            | 1.13                              | 1.34                                           | 0.88                              |
| R18                                                          | CH <sub>3</sub> *H* ↔ CH <sub>4</sub> *                                       | 1.41                                            | 0.67                              | 1.72                                           | 0.84                              |
| R19                                                          | CH <sub>4</sub> (G) + * ↔ CH <sub>4</sub> *                                   | 0                                               | 0.14                              | 0                                              | 0.15                              |
| <b>CO* → COH* → H*OH*C</b>                                   |                                                                               |                                                 |                                   |                                                |                                   |
| R20                                                          | CO*2H* ↔ COH*H*                                                               | 2.27                                            | 0.89                              | 3.18                                           | 1.00                              |
| R21                                                          | COH*H* ↔ C*OH*H*                                                              | 1.10                                            | 2.15                              | -                                              | -                                 |
| <b>CO* → HCO* → CH*</b>                                      |                                                                               |                                                 |                                   |                                                |                                   |
| R22                                                          | CO*2H* ↔ HCO*H*                                                               | 1.16                                            | 0.43                              | 1.52                                           | 0.35                              |
| R23                                                          | HCO*H* ↔ HC*O*H*                                                              | 0.9                                             | 1.71                              | 1.66                                           | 2.26                              |
| R24                                                          | HC*O*H* ↔ HC*OH*                                                              | 1.84                                            | 1.17                              | 1.56                                           | 1.01                              |
| R25                                                          | H <sub>2</sub> + HC*OH* ↔ HC*OH*2H*                                           | 0                                               | 1.28                              | 0                                              | 1.41                              |
| R26                                                          | HC*OH*2H* ↔ HC*H*H <sub>2</sub> O*                                            | 1.05                                            | 0.24                              | 1.81                                           | 0.90                              |
| R27                                                          | H <sub>2</sub> O + CH*H* ↔ HC*H*H <sub>2</sub> O*                             | 0                                               | 0.77                              | 0                                              | 0.32                              |
| <b>HCOH* → HC*OH*</b>                                        |                                                                               |                                                 |                                   |                                                |                                   |
| R28                                                          | COH*H* ↔ HCOH*                                                                | 1.25                                            | 0.61                              | -                                              | -                                 |
| R29                                                          | HCO*H* ↔ HCOH*                                                                | 2.28                                            | 1.30                              | 2.04                                           | 0.58                              |
| R30                                                          | HCOH* ↔ HC*OH*                                                                | 0.95                                            | 2.38                              | 0.19                                           | 1.70                              |
| <b>HCO* → H<sub>2</sub>CO* → H<sub>2</sub>C*</b>             |                                                                               |                                                 |                                   |                                                |                                   |
| R31                                                          | HCO*H* ↔ H <sub>2</sub> CO*                                                   | 1.19                                            | 0.95                              | 1.25                                           | 0.64                              |
| R32                                                          | H <sub>2</sub> CO* ↔ H <sub>2</sub> C*O*                                      | 2.19                                            | 2.78                              | 2.30                                           | 1.41                              |
| R33                                                          | H <sub>2</sub> + H <sub>2</sub> C*O* ↔ H <sub>2</sub> C*O*2H*                 | 0                                               | 1.32                              | 0                                              | 1.10                              |
| R34                                                          | H <sub>2</sub> C*O*2H* ↔ H <sub>2</sub> C*OH*H*                               | 1.10                                            | 1.06                              | 1.30                                           | 0.89                              |
| R35                                                          | H <sub>2</sub> C*OH*H* ↔ H <sub>2</sub> C*H <sub>2</sub> O*                   | 1.99                                            | 0.57                              | 2.17                                           | 1.00                              |
| R36                                                          | H <sub>2</sub> O + CH <sub>2</sub> * ↔ H <sub>2</sub> C*H <sub>2</sub> O*     | 0                                               | 0.70                              | 0                                              | 0.33                              |
| <b>H<sub>2</sub>COH* → H<sub>2</sub>C*</b>                   |                                                                               |                                                 |                                   |                                                |                                   |
| R37                                                          | H <sub>2</sub> + H <sub>2</sub> CO* ↔ H <sub>2</sub> CO*2H*                   | 0                                               | 1.23                              | 0                                              | 1.56                              |
| R38                                                          | H <sub>2</sub> CO*2H* ↔ H <sub>2</sub> COH*H*                                 | 1.58                                            | 0.76                              | 1.52                                           | 0.26                              |
| R39                                                          | H <sub>2</sub> COH*H* ↔ H <sub>2</sub> C*OH*H*                                | 0.52                                            | 1.98                              | 0.46                                           | 1.75                              |
| <b>H<sub>2</sub>CO* → H<sub>3</sub>CO* → H<sub>3</sub>C*</b> |                                                                               |                                                 |                                   |                                                |                                   |
| R40                                                          | H <sub>2</sub> CO*2H* ↔ H <sub>3</sub> CO*H*                                  | 0.91                                            | 0.38                              | 0.92                                           | 0.39                              |
| R41                                                          | H <sub>3</sub> CO*H* ↔ H <sub>3</sub> C*O*H*                                  | 0.75                                            | 1.00                              | 0.88                                           | 2.06                              |
| R42                                                          | H <sub>3</sub> C*O*H* ↔ H <sub>3</sub> C*OH*                                  | 0.34                                            | 0.89                              | 1.71                                           | 1.19                              |
| A43                                                          | H <sub>2</sub> + H <sub>3</sub> C*OH* ↔ H <sub>3</sub> C*OH*2H*               | 0                                               | 1.34                              | 0                                              | 1.17                              |
| R44                                                          | H <sub>3</sub> C*OH*2H* ↔ H <sub>3</sub> C*H <sub>2</sub> O*H*                | 1.66                                            | 1.28                              | 1.21                                           | 1.92                              |
| R45                                                          | H <sub>2</sub> O + CH <sub>3</sub> *H* ↔ H <sub>3</sub> C*H <sub>2</sub> O*H* | 0                                               | 1.05                              | 0                                              | 0.19                              |
| <b>H<sub>3</sub>COH* → H<sub>3</sub>C*</b>                   |                                                                               |                                                 |                                   |                                                |                                   |
| R46                                                          | H <sub>2</sub> COH*H* ↔ H <sub>3</sub> COH*                                   | 0.93                                            | 0.35                              | 0.97                                           | 0.53                              |
| R47                                                          | H <sub>3</sub> CO*H* ↔ H <sub>3</sub> COH*                                    | 1.80                                            | 0.93                              | 2.23                                           | 1.06                              |
| R48                                                          | H <sub>3</sub> COH* ↔ H <sub>3</sub> C*OH*                                    | 0.55                                            | 2.25                              | 0.83                                           | 2.66                              |
| R49                                                          | H <sub>3</sub> COH(G) + * ↔ H <sub>3</sub> COH*                               | 0                                               | 0.53                              | 0                                              | 0.68                              |

| <b>CO<sub>2</sub>*2H* → COOH* → CO*OH*H</b>         |                                                                              |      |      |      |      |
|-----------------------------------------------------|------------------------------------------------------------------------------|------|------|------|------|
| R50                                                 | CO <sub>2</sub> *2H* ↔ COOH*H*                                               | 1.98 | 1.10 | 2.19 | 1.15 |
| R51                                                 | COOH*H* ↔ CO*OH*H*                                                           | 0.69 | 2.35 | 0.60 | 1.72 |
| <b>CO<sub>2</sub>*2H* → HCOO* → HCO*</b>            |                                                                              |      |      |      |      |
| R52                                                 | CO <sub>2</sub> *2H* ↔ HCOO*H*                                               | 1.24 | 1.26 | 1.46 | 1.26 |
| R53                                                 | HCOO*H* ↔ HCO*O*H*                                                           | 2.80 | 2.95 | 2.49 | 2.61 |
| R54                                                 | HCO*O*H* ↔ HCO*OH*                                                           | 1.77 | 0.95 | 1.64 | 1.06 |
| R55                                                 | H <sub>2</sub> + HCO*OH* ↔ HCO*OH*2H*                                        | 0    | 1.16 | 0    | 1.25 |
| R56                                                 | HCO*OH*2H* ↔ HCO*H <sub>2</sub> O*H*                                         | 0.86 | 0.13 | 1.29 | 0.72 |
| R57                                                 | H <sub>2</sub> O + HCO*H* ↔ HCO*H <sub>2</sub> O*H*                          | 0    | 0.33 | 0    | 0.72 |
| <b>HCOOH* → HCO*OH*</b>                             |                                                                              |      |      |      |      |
| R58                                                 | HCOO*H* ↔ HCOOH*                                                             | 2.08 | 0.21 | 2.14 | 0.32 |
| R59                                                 | HCOOH* ↔ HCO*OH*                                                             | 1.43 | 2.64 | 0.26 | 1.61 |
| <b>HCOO* → H<sub>2</sub>COO* → H<sub>2</sub>CO*</b> |                                                                              |      |      |      |      |
| R60                                                 | HCOO*H* ↔ H <sub>2</sub> COO*                                                | 2.74 | 1.27 | -    | -    |
| R61                                                 | H <sub>2</sub> COO* ↔ H <sub>2</sub> CO*O*                                   | 1.48 | 2.57 | -    | -    |
| R62                                                 | H <sub>2</sub> + H <sub>2</sub> CO*O* ↔ H <sub>2</sub> CO*O*2H*              | 0    | 0.93 | -    | -    |
| R63                                                 | H <sub>2</sub> CO*O*2H* ↔ H <sub>2</sub> CO*OH*H*                            | 2.02 | 1.72 | -    | -    |
| R64                                                 | H <sub>2</sub> CO*OH*H* ↔ H <sub>2</sub> CO*H <sub>2</sub> O*                | 1.80 | 0.48 | -    | -    |
| R65                                                 | H <sub>2</sub> O* + H <sub>2</sub> CO* ↔ H <sub>2</sub> CO*H <sub>2</sub> O* | 0    | 0.11 | -    | -    |
| <b>Additional CO desorption</b>                     |                                                                              |      |      |      |      |
| R66                                                 | CO + 2H* ↔ CO*2H*                                                            | 0    | 2.17 | 0    | 2.54 |

Table S2. Pre-exponential factors of CO<sub>2</sub> methanation on Ni<sub>8</sub>/TiO<sub>2</sub>-a and Ni<sub>8</sub>/TiO<sub>2</sub>-r. Pre-exponential factors are estimated by the transition state theory at 600 K. For adsorption steps, the pressure was set to 1 bar and the area was estimated to be 2.5 Å<sup>2</sup>. The reaction numbers are the same as in Figure 4 and Figure 7.

| No.                                                          | Elementary reaction                                                           | Ni <sub>8</sub> /TiO <sub>2</sub> -a |                       | Ni <sub>8</sub> /TiO <sub>2</sub> -r |                       |
|--------------------------------------------------------------|-------------------------------------------------------------------------------|--------------------------------------|-----------------------|--------------------------------------|-----------------------|
|                                                              |                                                                               | $A_{\text{forward}}$                 | $A_{\text{backward}}$ | $A_{\text{forward}}$                 | $A_{\text{backward}}$ |
| <b>CO<sub>2</sub>* → CO* → C* → CH<sub>4</sub></b>           |                                                                               |                                      |                       |                                      |                       |
| R1                                                           | H <sub>2</sub> + * ↔ 2H**                                                     | 1.92×10 <sup>08</sup>                | 1.30×10 <sup>14</sup> | 1.92×10 <sup>08</sup>                | 1.30×10 <sup>14</sup> |
| R2                                                           | CO <sub>2</sub> + 2H* ↔ CO <sub>2</sub> *2H*                                  | 4.11×10 <sup>07</sup>                | 1.38×10 <sup>16</sup> | 4.11×10 <sup>07</sup>                | 1.38×10 <sup>16</sup> |
| R3                                                           | CO <sub>2</sub> *2H* ↔ CO*O*2H*                                               | 3.25×10 <sup>11</sup>                | 6.09×10 <sup>11</sup> | 5.18×10 <sup>13</sup>                | 2.35×10 <sup>14</sup> |
| R4                                                           | CO*O*2H* ↔ CO*OH*H*                                                           | 1.38×10 <sup>12</sup>                | 2.89×10 <sup>12</sup> | 2.03×10 <sup>13</sup>                | 3.30×10 <sup>11</sup> |
| R5                                                           | CO*OH*H* ↔ CO*H <sub>2</sub> O*                                               | 1.51×10 <sup>12</sup>                | 3.78×10 <sup>11</sup> | 6.21×10 <sup>11</sup>                | 2.35×10 <sup>10</sup> |
| R6                                                           | H <sub>2</sub> O + CO* ↔ CO*H <sub>2</sub> O*                                 | 6.42×10 <sup>07</sup>                | 4.06×10 <sup>14</sup> | 6.42×10 <sup>07</sup>                | 4.06×10 <sup>14</sup> |
| R7                                                           | CO + * ↔ CO*                                                                  | 2.06×10 <sup>07</sup>                | 3.34×10 <sup>17</sup> | 5.15×10 <sup>07</sup>                | 2.22×10 <sup>17</sup> |
| R8                                                           | CO* + H <sub>2</sub> ↔ CO*2H*                                                 | 1.92×10 <sup>08</sup>                | 2.51×10 <sup>14</sup> | 1.92×10 <sup>08</sup>                | 3.78×10 <sup>14</sup> |
| R9                                                           | CO*2H* ↔ C*O*2H*                                                              | 2.87×10 <sup>12</sup>                | 5.59×10 <sup>12</sup> | 2.48×10 <sup>11</sup>                | 1.01×10 <sup>13</sup> |
| R10                                                          | C*O*2H* ↔ C*OH*H*                                                             | 1.47×10 <sup>13</sup>                | 1.03×10 <sup>13</sup> | 7.59×10 <sup>13</sup>                | 2.53×10 <sup>13</sup> |
| R11                                                          | C*OH*H* ↔ C*H <sub>2</sub> O*                                                 | 9.00×10 <sup>12</sup>                | 2.95×10 <sup>12</sup> | 5.36×10 <sup>12</sup>                | 3.34×10 <sup>12</sup> |
| R12                                                          | H <sub>2</sub> O + C* ↔ C*H <sub>2</sub> O*                                   | 6.42×10 <sup>07</sup>                | 3.96×10 <sup>15</sup> | 6.42×10 <sup>07</sup>                | 4.81×10 <sup>14</sup> |
| R13                                                          | H <sub>2</sub> + C* ↔ C*2H*                                                   | 1.92×10 <sup>08</sup>                | 1.67×10 <sup>14</sup> | 1.92×10 <sup>08</sup>                | 1.99×10 <sup>14</sup> |
| R14                                                          | C*H <sub>2</sub> * ↔ CH*H*                                                    | 7.08×10 <sup>12</sup>                | 5.94×10 <sup>12</sup> | 1.50×10 <sup>13</sup>                | 1.78×10 <sup>13</sup> |
| R15                                                          | CH*H* ↔ CH <sub>2</sub> *                                                     | 9.96×10 <sup>12</sup>                | 5.90×10 <sup>12</sup> | 1.06×10 <sup>13</sup>                | 4.70×10 <sup>12</sup> |
| R16                                                          | H <sub>2</sub> * + CH <sub>2</sub> * ↔ CH <sub>2</sub> *2H*                   | 1.92×10 <sup>08</sup>                | 1.52×10 <sup>14</sup> | 1.92×10 <sup>08</sup>                | 2.02×10 <sup>14</sup> |
| R17                                                          | CH <sub>2</sub> *2H* ↔ CH <sub>3</sub> *H*                                    | 6.66×10 <sup>12</sup>                | 2.48×10 <sup>13</sup> | 5.27×10 <sup>12</sup>                | 4.98×10 <sup>11</sup> |
| R18                                                          | CH <sub>3</sub> *H* ↔ CH <sub>4</sub> *                                       | 1.12×10 <sup>13</sup>                | 8.76×10 <sup>11</sup> | 8.36×10 <sup>11</sup>                | 6.34×10 <sup>12</sup> |
| R19                                                          | CH <sub>4</sub> (G) + * ↔ CH <sub>4</sub> *                                   | 6.80×10 <sup>07</sup>                | 7.29×10 <sup>14</sup> | 6.80×10 <sup>07</sup>                | 2.43×10 <sup>15</sup> |
| <b>CO* → COH* → H*OH*C</b>                                   |                                                                               |                                      |                       |                                      |                       |
| R20                                                          | CO*2H* ↔ COH*H*                                                               | 1.32×10 <sup>14</sup>                | 6.91×10 <sup>13</sup> | 2.62×10 <sup>13</sup>                | 4.25×10 <sup>12</sup> |
| R21                                                          | COH*H* ↔ C*OH*H*                                                              | 1.48×10 <sup>13</sup>                | 3.85×10 <sup>13</sup> | -                                    | -                     |
| <b>CO* → HCO* → CH*</b>                                      |                                                                               |                                      |                       |                                      |                       |
| R22                                                          | CO*2H* ↔ HCO*H*                                                               | 9.26×10 <sup>13</sup>                | 6.18×10 <sup>13</sup> | 6.40×10 <sup>12</sup>                | 2.29×10 <sup>13</sup> |
| R23                                                          | HCO*H* ↔ HC*O*H*                                                              | 6.52×10 <sup>12</sup>                | 1.24×10 <sup>13</sup> | 1.06×10 <sup>13</sup>                | 1.39×10 <sup>13</sup> |
| R24                                                          | HC*O*H* ↔ HC*OH*                                                              | 1.05×10 <sup>13</sup>                | 1.34×10 <sup>13</sup> | 1.78×10 <sup>13</sup>                | 1.80×10 <sup>12</sup> |
| R25                                                          | H <sub>2</sub> + HC*OH* ↔ HC*OH*2H*                                           | 1.92×10 <sup>08</sup>                | 1.53×10 <sup>14</sup> | 1.92×10 <sup>08</sup>                | 1.27×10 <sup>14</sup> |
| R26                                                          | HC*OH*2H* ↔ HC*H*H <sub>2</sub> O*                                            | 1.92×10 <sup>13</sup>                | 1.91×10 <sup>13</sup> | 1.23×10 <sup>14</sup>                | 6.99×10 <sup>12</sup> |
| R27                                                          | H <sub>2</sub> O + CH*H* ↔ HC*H*H <sub>2</sub> O*                             | 6.42×10 <sup>07</sup>                | 2.08×10 <sup>15</sup> | 6.42×10 <sup>07</sup>                | 2.20×10 <sup>15</sup> |
| <b>HCOH* → HC*OH*</b>                                        |                                                                               |                                      |                       |                                      |                       |
| R28                                                          | COH*H* ↔ HCOH*                                                                | 6.84×10 <sup>12</sup>                | 3.02×10 <sup>13</sup> | -                                    | -                     |
| R29                                                          | HCO*H* ↔ HCOH*                                                                | 1.02×10 <sup>13</sup>                | 3.55×10 <sup>13</sup> | 1.45×10 <sup>13</sup>                | 4.76×10 <sup>12</sup> |
| R30                                                          | HCOH* ↔ HC*OH*                                                                | 8.90×10 <sup>12</sup>                | 6.24×10 <sup>12</sup> | 2.44×10 <sup>12</sup>                | 9.85×10 <sup>11</sup> |
| <b>HCO* → H<sub>2</sub>CO* → H<sub>2</sub>C*</b>             |                                                                               |                                      |                       |                                      |                       |
| R31                                                          | HCO*H* ↔ H <sub>2</sub> CO*                                                   | 4.21×10 <sup>12</sup>                | 1.09×10 <sup>13</sup> | 1.35×10 <sup>13</sup>                | 2.11×10 <sup>13</sup> |
| R32                                                          | H <sub>2</sub> CO* ↔ H <sub>2</sub> C*O*                                      | 3.97×10 <sup>12</sup>                | 6.85×10 <sup>11</sup> | 9.24×10 <sup>13</sup>                | 4.27×10 <sup>13</sup> |
| R33                                                          | H <sub>2</sub> + H <sub>2</sub> C*O* ↔ H <sub>2</sub> C*O*2H*                 | 1.92×10 <sup>08</sup>                | 1.57×10 <sup>14</sup> | 1.92×10 <sup>08</sup>                | 1.68×10 <sup>14</sup> |
| R34                                                          | H <sub>2</sub> C*O*2H* ↔ H <sub>2</sub> C*OH*H*                               | 1.35×10 <sup>13</sup>                | 3.09×10 <sup>13</sup> | 1.81×10 <sup>13</sup>                | 9.94×10 <sup>12</sup> |
| R35                                                          | H <sub>2</sub> C*OH*H* ↔ H <sub>2</sub> C*H <sub>2</sub> O*                   | 4.31×10 <sup>13</sup>                | 2.37×10 <sup>12</sup> | 9.94×10 <sup>12</sup>                | 9.80×10 <sup>11</sup> |
| R36                                                          | H <sub>2</sub> O + CH <sub>2</sub> * ↔ H <sub>2</sub> C*H <sub>2</sub> O*     | 6.42×10 <sup>07</sup>                | 3.78×10 <sup>15</sup> | 6.42×10 <sup>07</sup>                | 2.21×10 <sup>15</sup> |
| <b>H<sub>2</sub>COH* → H<sub>2</sub>C*</b>                   |                                                                               |                                      |                       |                                      |                       |
| R37                                                          | H <sub>2</sub> + H <sub>2</sub> CO* ↔ H <sub>2</sub> CO*2H*                   | 1.92×10 <sup>08</sup>                | 2.20×10 <sup>14</sup> | 1.92×10 <sup>08</sup>                | 2.28×10 <sup>14</sup> |
| R38                                                          | H <sub>2</sub> CO*2H* ↔ H <sub>2</sub> COH*H*                                 | 5.10×10 <sup>13</sup>                | 1.04×10 <sup>14</sup> | 6.00×10 <sup>12</sup>                | 3.36×10 <sup>12</sup> |
| R39                                                          | H <sub>2</sub> COH*H* ↔ H <sub>2</sub> C*OH*H*                                | 1.38×10 <sup>15</sup>                | 1.26×10 <sup>15</sup> | 6.89×10 <sup>12</sup>                | 5.53×10 <sup>12</sup> |
| <b>H<sub>2</sub>CO* → H<sub>3</sub>CO* → H<sub>3</sub>C*</b> |                                                                               |                                      |                       |                                      |                       |
| R40                                                          | H <sub>2</sub> CO*2H* ↔ H <sub>3</sub> CO*H*                                  | 1.08×10 <sup>13</sup>                | 2.20×10 <sup>13</sup> | 2.55×10 <sup>13</sup>                | 6.18×10 <sup>13</sup> |
| R41                                                          | H <sub>3</sub> CO*H* ↔ H <sub>3</sub> C*O*H*                                  | 8.28×10 <sup>13</sup>                | 9.19×10 <sup>11</sup> | 4.40×10 <sup>13</sup>                | 1.09×10 <sup>13</sup> |
| R42                                                          | H <sub>3</sub> C*O*H* ↔ H <sub>3</sub> C*OH*                                  | 1.02×10 <sup>13</sup>                | 3.69×10 <sup>13</sup> | 2.13×10 <sup>13</sup>                | 1.81×10 <sup>13</sup> |
| A43                                                          | H <sub>2</sub> + H <sub>3</sub> C*OH* ↔ H <sub>3</sub> C*OH*2H*               | 1.92×10 <sup>08</sup>                | 1.69×10 <sup>14</sup> | 1.92×10 <sup>08</sup>                | 1.98×10 <sup>14</sup> |
| R44                                                          | H <sub>3</sub> C*OH*2H* ↔ H <sub>3</sub> C*H <sub>2</sub> O*H*                | 6.06×10 <sup>14</sup>                | 8.93×10 <sup>12</sup> | 8.62×10 <sup>12</sup>                | 2.98×10 <sup>12</sup> |
| R45                                                          | H <sub>2</sub> O + CH <sub>3</sub> *H* ↔ H <sub>3</sub> C*H <sub>2</sub> O*H* | 6.42×10 <sup>07</sup>                | 1.26×10 <sup>16</sup> | 6.42×10 <sup>07</sup>                | 1.11×10 <sup>15</sup> |
| <b>H<sub>3</sub>COH* → H<sub>3</sub>C*</b>                   |                                                                               |                                      |                       |                                      |                       |
| R46                                                          | H <sub>2</sub> COH*H* ↔ H <sub>3</sub> COH*                                   | 2.25×10 <sup>13</sup>                | 5.71×10 <sup>12</sup> | 5.92×10 <sup>12</sup>                | 2.43×10 <sup>12</sup> |
| R47                                                          | H <sub>3</sub> CO*H* ↔ H <sub>3</sub> COH*                                    | 3.43×10 <sup>12</sup>                | 8.74×10 <sup>11</sup> | 2.50×10 <sup>12</sup>                | 2.38×10 <sup>11</sup> |
| R48                                                          | H <sub>3</sub> COH* ↔ H <sub>3</sub> C*OH*                                    | 8.52×10 <sup>12</sup>                | 1.34×10 <sup>12</sup> | 8.33×10 <sup>12</sup>                | 1.86×10 <sup>13</sup> |
| R49                                                          | H <sub>3</sub> COH(G) + * ↔ H <sub>3</sub> COH*                               | 4.81×10 <sup>07</sup>                | 2.19×10 <sup>17</sup> | 4.81×10 <sup>07</sup>                | 1.49×10 <sup>17</sup> |

| <b>CO<sub>2</sub>*2H* → COOH* → CO*OH*H</b>         |                                                                              |                       |                       |                       |                       |
|-----------------------------------------------------|------------------------------------------------------------------------------|-----------------------|-----------------------|-----------------------|-----------------------|
| R50                                                 | CO <sub>2</sub> *2H* ↔ COOH*H*                                               | 3.58×10 <sup>11</sup> | 1.32×10 <sup>13</sup> | 2.30×10 <sup>12</sup> | 3.19×10 <sup>12</sup> |
| R51                                                 | COOH*H* ↔ CO*OH*H*                                                           | 4.31×10 <sup>13</sup> | 9.24×10 <sup>12</sup> | 2.14×10 <sup>13</sup> | 8.26×10 <sup>12</sup> |
| <b>CO<sub>2</sub>*2H* → HCOO* → HCO*</b>            |                                                                              |                       |                       |                       |                       |
| R52                                                 | CO <sub>2</sub> *2H* ↔ HCOO*H*                                               | 1.29×10 <sup>12</sup> | 4.87×10 <sup>12</sup> | 1.87×10 <sup>13</sup> | 4.27×10 <sup>12</sup> |
| R53                                                 | HCOO*H* ↔ HCO*O*H*                                                           | 3.16×10 <sup>12</sup> | 3.18×10 <sup>12</sup> | 4.90×10 <sup>11</sup> | 7.42×10 <sup>11</sup> |
| R54                                                 | HCO*O*H* ↔ HCO*OH*                                                           | 1.44×10 <sup>13</sup> | 3.89×10 <sup>12</sup> | 1.06×10 <sup>13</sup> | 2.18×10 <sup>12</sup> |
| R55                                                 | H <sub>2</sub> + HCO*OH* ↔ HCO*OH*2H*                                        | 1.92×10 <sup>08</sup> | 2.15×10 <sup>14</sup> | 1.92×10 <sup>08</sup> | 3.02×10 <sup>14</sup> |
| R56                                                 | HCO*OH*2H* ↔ HCO*H <sub>2</sub> O*H*                                         | 2.84×10 <sup>12</sup> | 1.15×10 <sup>13</sup> | 4.90×10 <sup>12</sup> | 3.97×10 <sup>12</sup> |
| R57                                                 | H <sub>2</sub> O + HCO*H* ↔ HCO*H <sub>2</sub> O*H*                          | 6.42×10 <sup>07</sup> | 3.68×10 <sup>15</sup> | 6.42×10 <sup>07</sup> | 2.47×10 <sup>15</sup> |
| <b>HCOOH* → HCO*OH*</b>                             |                                                                              |                       |                       |                       |                       |
| R58                                                 | HCOO*H* ↔ HCOOH*                                                             | 2.12×10 <sup>12</sup> | 6.80×10 <sup>12</sup> | 6.05×10 <sup>11</sup> | 5.36×10 <sup>10</sup> |
| R59                                                 | HCOOH* ↔ HCO*OH*                                                             | 2.34×10 <sup>13</sup> | 1.99×10 <sup>12</sup> | 4.30×10 <sup>10</sup> | 9.48×10 <sup>11</sup> |
| <b>HCOO* → H<sub>2</sub>COO* → H<sub>2</sub>CO*</b> |                                                                              |                       |                       |                       |                       |
| R60                                                 | HCOO*H* ↔ H <sub>2</sub> COO*                                                | 3.48×10 <sup>12</sup> | 5.61×10 <sup>13</sup> | -                     | -                     |
| R61                                                 | H <sub>2</sub> COO* ↔ H <sub>2</sub> CO*O*                                   | 2.51×10 <sup>12</sup> | 6.53×10 <sup>12</sup> | -                     | -                     |
| R62                                                 | H <sub>2</sub> + H <sub>2</sub> CO*O* ↔ H <sub>2</sub> CO*O*2H*              | 1.92×10 <sup>08</sup> | 2.44×10 <sup>14</sup> | -                     | -                     |
| R63                                                 | H <sub>2</sub> CO*O*2H* ↔ H <sub>2</sub> CO*OH*H*                            | 6.14×10 <sup>11</sup> | 5.13×10 <sup>12</sup> | -                     | -                     |
| R64                                                 | H <sub>2</sub> CO*OH*H* ↔ H <sub>2</sub> CO*H <sub>2</sub> O*                | 2.90×10 <sup>13</sup> | 5.49×10 <sup>11</sup> | -                     | -                     |
| R65                                                 | H <sub>2</sub> O* + H <sub>2</sub> CO* ↔ H <sub>2</sub> CO*H <sub>2</sub> O* | 6.42×10 <sup>07</sup> | 1.00×10 <sup>15</sup> | -                     | -                     |
| <b>Additional CO desorption</b>                     |                                                                              |                       |                       |                       |                       |
| R66                                                 | CO + 2H* ↔ CO*2H*                                                            | 5.15×10 <sup>07</sup> | 5.90×10 <sup>16</sup> | 5.15×10 <sup>07</sup> | 1.05×10 <sup>15</sup> |





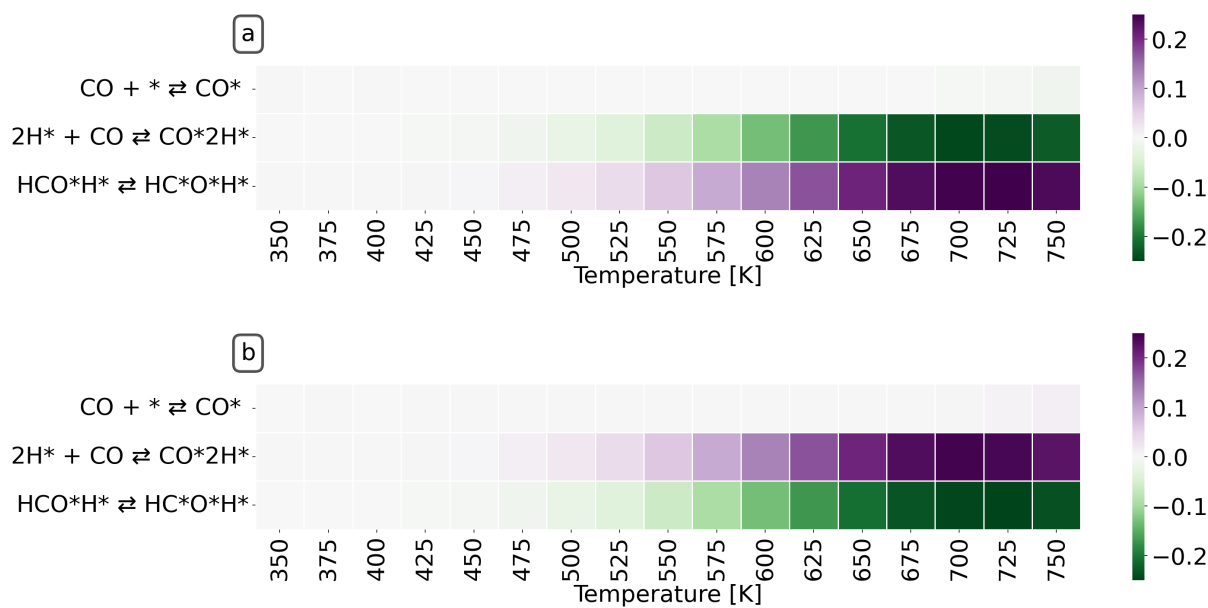

Figure S19. Degree of selectivity control (DSC) of (a) CH<sub>4</sub> and (b) CO formation as a function of temperature on Ni<sub>8</sub>/TiO<sub>2</sub>-a.

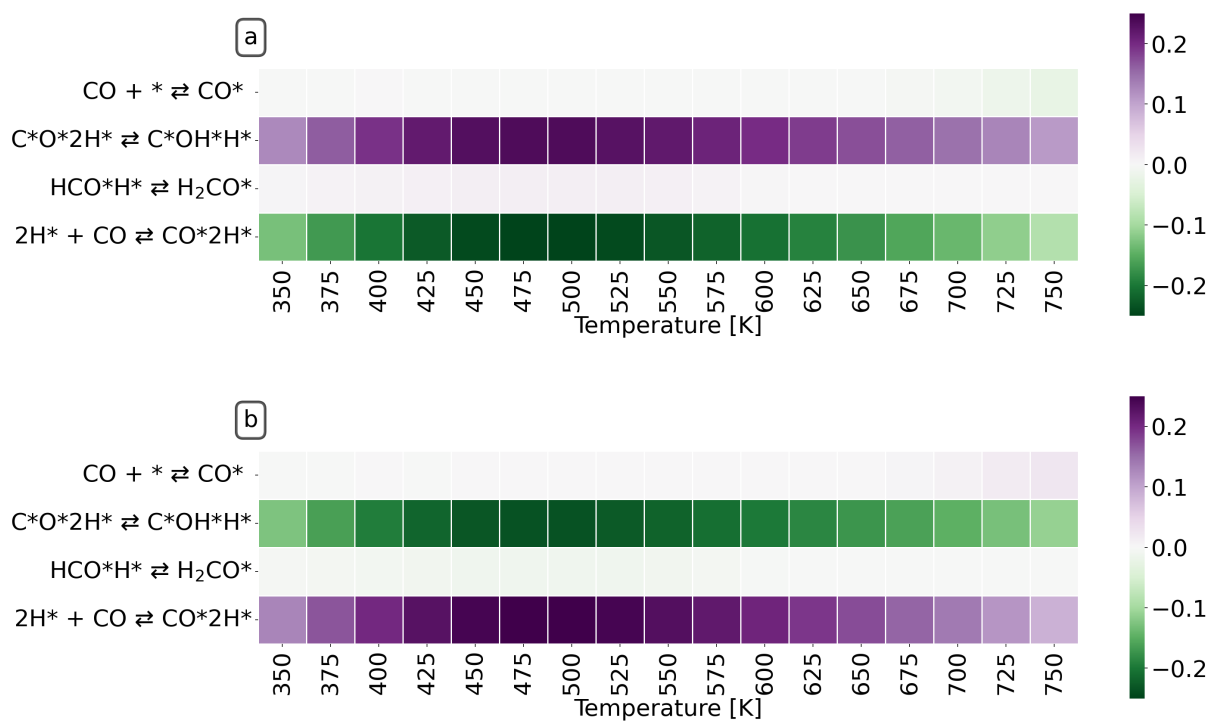

Figure S20. Degree of selectivity control (DSC) of (a) CH<sub>4</sub> and (b) CO formation as a function of temperature on Ni<sub>8</sub>/TiO<sub>2</sub>-r.

Table S3: Activation energies and reaction energies of direct CO dissociation on Ni<sub>8</sub>/TiO<sub>2</sub> anatase and rutile as function of the number of co-adsorbed H\* atoms. (energies in eV and ZPE correction is included)

|                                           | #H* | $\Delta E_{\text{act}}$ | $\Delta E_{\text{R}}$ |
|-------------------------------------------|-----|-------------------------|-----------------------|
| Ni <sub>8</sub> /TiO <sub>2</sub> anatase | 2   | 1.99                    | -0.24                 |
|                                           | 3   | 2.28                    | 0.79                  |
|                                           | 4   | 2.50                    | 1.00                  |
| Ni <sub>8</sub> /TiO <sub>2</sub> rutile  | 2   | 1.41                    | 0.33                  |
|                                           | 3   | 1.34                    | 0.81                  |
|                                           | 4   | 1.71                    | 1.13                  |

Table S4: Activation energies and reaction energies of direct CO dissociation on Ni<sub>8</sub>/TiO<sub>2</sub> anatase and rutile as function of the number of co-adsorbed H\* atoms. (energies in eV and ZPE correction is included)

|                                           | #H* | Reaction         | $\Delta E_{\text{act}}$ | $\Delta E_{\text{R}}$ | Overall activation energy |
|-------------------------------------------|-----|------------------|-------------------------|-----------------------|---------------------------|
| Ni <sub>8</sub> /TiO <sub>2</sub> anatase | 2   | HCO formation    | 1.16                    | 0.73                  | 1.66                      |
|                                           |     | HCO dissociation | 0.93                    | -0.79                 |                           |
|                                           | 3   | HCO formation    | 0.94                    | 0.82                  | 1.83                      |
|                                           |     | HCO dissociation | 1.01                    | -0.38                 |                           |
|                                           | 4   | HCO formation    | 1.03                    | 0.83                  | 2.00                      |
|                                           |     | HCO dissociation | 1.17                    | -0.12                 |                           |
| Ni <sub>8</sub> /TiO <sub>2</sub> anatase | 2   | HCO formation    | 1.52                    | 1.18                  | 2.84                      |
|                                           |     | HCO dissociation | 1.66                    | -0.60                 |                           |
|                                           | 3   | HCO formation    | 1.02                    | 0.51                  | 2.49                      |
|                                           |     | HCO dissociation | 1.98                    | -0.14                 |                           |
|                                           | 4   | HCO formation    | 1.34                    | 0.60                  | 2.67                      |
|                                           |     | HCO dissociation | 2.07                    | -0.01                 |                           |

Additionally, the adsorption energy of H\* was calculated to evaluate the possibility for a higher H\* coverage. The results, summarized in Table R3, indicate that on both Ni<sub>8</sub>/TiO<sub>2</sub> anatase and rutile surfaces, the adsorption of additional H\* onto CO\*2H\* is less exothermic, particularly on Ni<sub>8</sub>/TiO<sub>2</sub> rutile. Given the associated decrease in entropy during the adsorption process, the presence of 3H\* and 4H\* is deemed unlikely.

Table S5: The adsorption energy of H\* on Ni<sub>8</sub>/TiO<sub>2</sub> anatase and rutile. (energies in eV and ZPE correction is included)

|                                           | Reaction                           | $\Delta E_{\text{R, forward}}$ | $\Delta E_{\text{R, backward}}$ |
|-------------------------------------------|------------------------------------|--------------------------------|---------------------------------|
| Ni <sub>8</sub> /TiO <sub>2</sub> anatase | CO* + H <sub>2</sub> ↔ CO*2H*      | 0                              | 1.46                            |
|                                           | CO*2H* + ½ H <sub>2</sub> ↔ CO*3H* | 0                              | 0.62                            |
|                                           | CO*3H* + ½ H <sub>2</sub> ↔ CO*3H* | 0                              | 0.47                            |



|                                          |                                                                                          |   |      |
|------------------------------------------|------------------------------------------------------------------------------------------|---|------|
| Ni <sub>8</sub> /TiO <sub>2</sub> rutile | $\text{CO}^* + \text{H}_2 \leftrightarrow \text{CO}^*\text{2H}^*$                        | 0 | 1.78 |
|                                          | $\text{CO}^*\text{2H}^* + \frac{1}{2} \text{H}_2 \leftrightarrow \text{CO}^*\text{3H}^*$ | 0 | 0.22 |
|                                          | $\text{CO}^*\text{3H}^* + \frac{1}{2} \text{H}_2 \leftrightarrow \text{CO}^*\text{3H}^*$ | 0 | 0.53 |

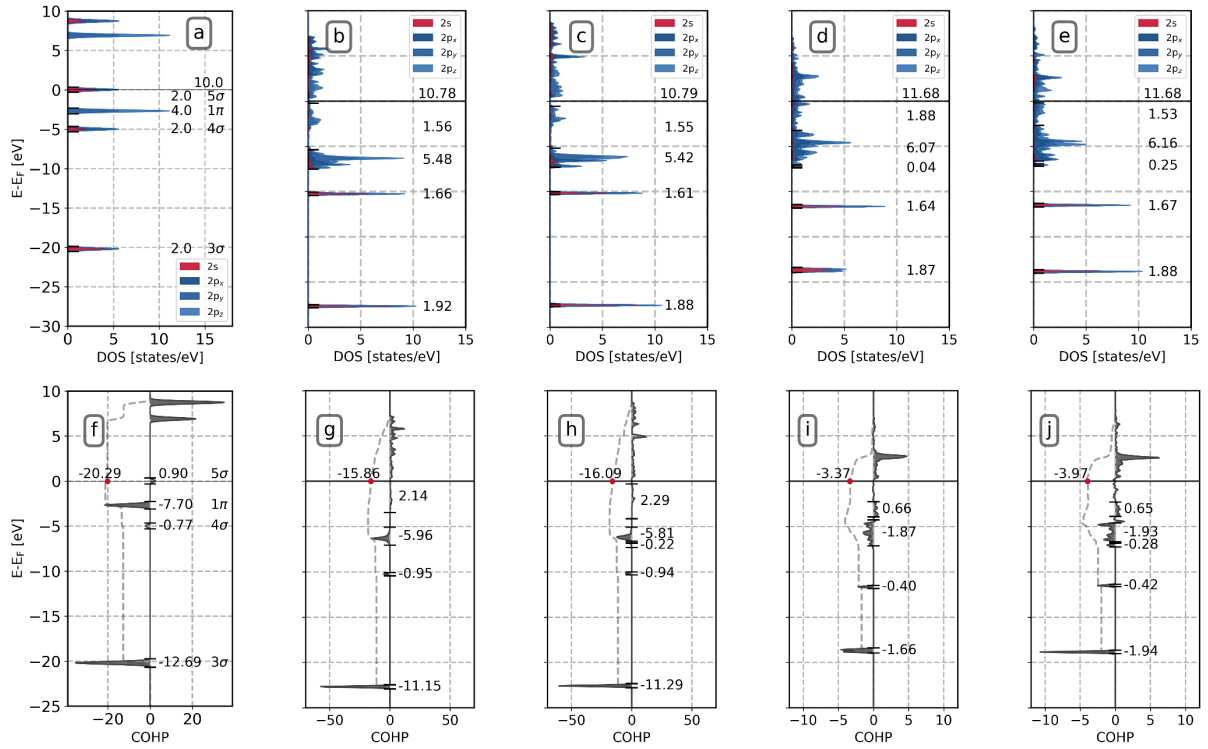

Figure S21. Analysis of DOS and COHP for gas-phase CO (a and f), adsorbed on Ni<sub>8</sub>/TiO<sub>2</sub>-a and Ni<sub>8</sub>/TiO<sub>2</sub>-r. The analysis includes both the initial state (IS) and transition state (TS) of CO direct dissociation on Ni<sub>8</sub>/TiO<sub>2</sub>-a and Ni<sub>8</sub>/TiO<sub>2</sub>-r. (a) to (e): DOS analysis; (f) to (j): COHP analysis. (b) and (g): IS on Ni<sub>8</sub>/TiO<sub>2</sub>-a; (c) and (i): IS on Ni<sub>8</sub>/TiO<sub>2</sub>-r; (d) and (h): TS on Ni<sub>8</sub>/TiO<sub>2</sub>-a; (e) and (j): TS on Ni<sub>8</sub>/TiO<sub>2</sub>-r. The numeric values above Fermi level indicate the integrated DOS (iDOS) and integrated COHP (iCOHP).

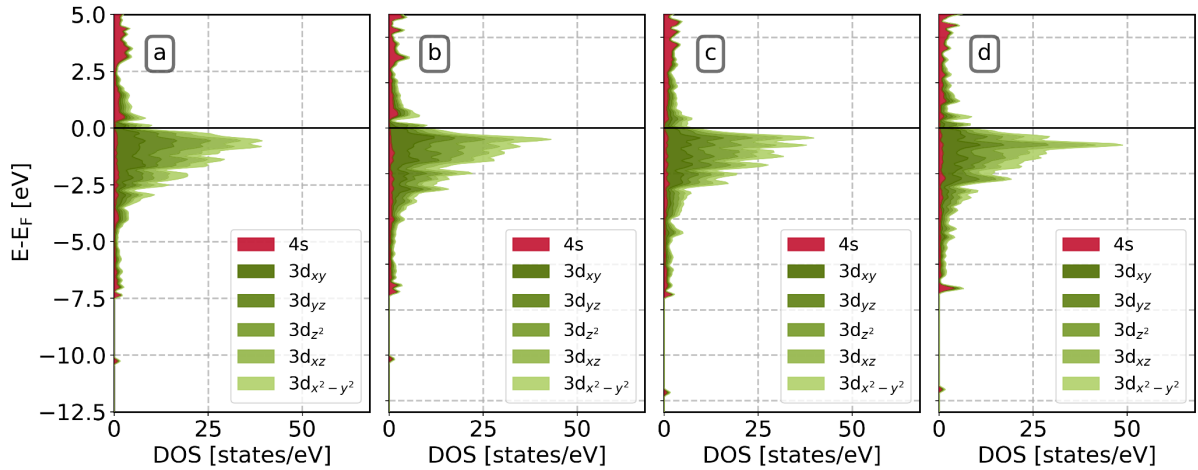

Figure S22. DOS analysis for Ni<sub>8</sub> clusters in the initial state (IS) and transition state (TS) of direct dissociation of CO\* on both Ni<sub>8</sub>/TiO<sub>2</sub>-a and Ni<sub>8</sub>/TiO<sub>2</sub>-r. (a) IS on Ni<sub>8</sub>/TiO<sub>2</sub>-a; (b): IS on Ni<sub>8</sub>/TiO<sub>2</sub>-r; (c) TS on Ni<sub>8</sub>/TiO<sub>2</sub>-a; (d): TS on Ni<sub>8</sub>/TiO<sub>2</sub>-r. The numeric values above Fermi level indicate the integrated DOS (iDOS).

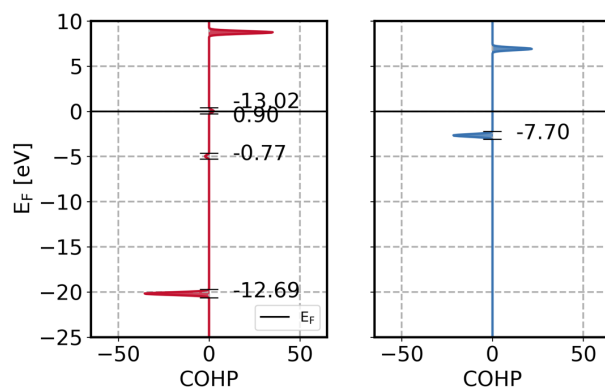

Figure S23. COHP of sigma (red) and pi (blue) orbitals for gas-phase CO.

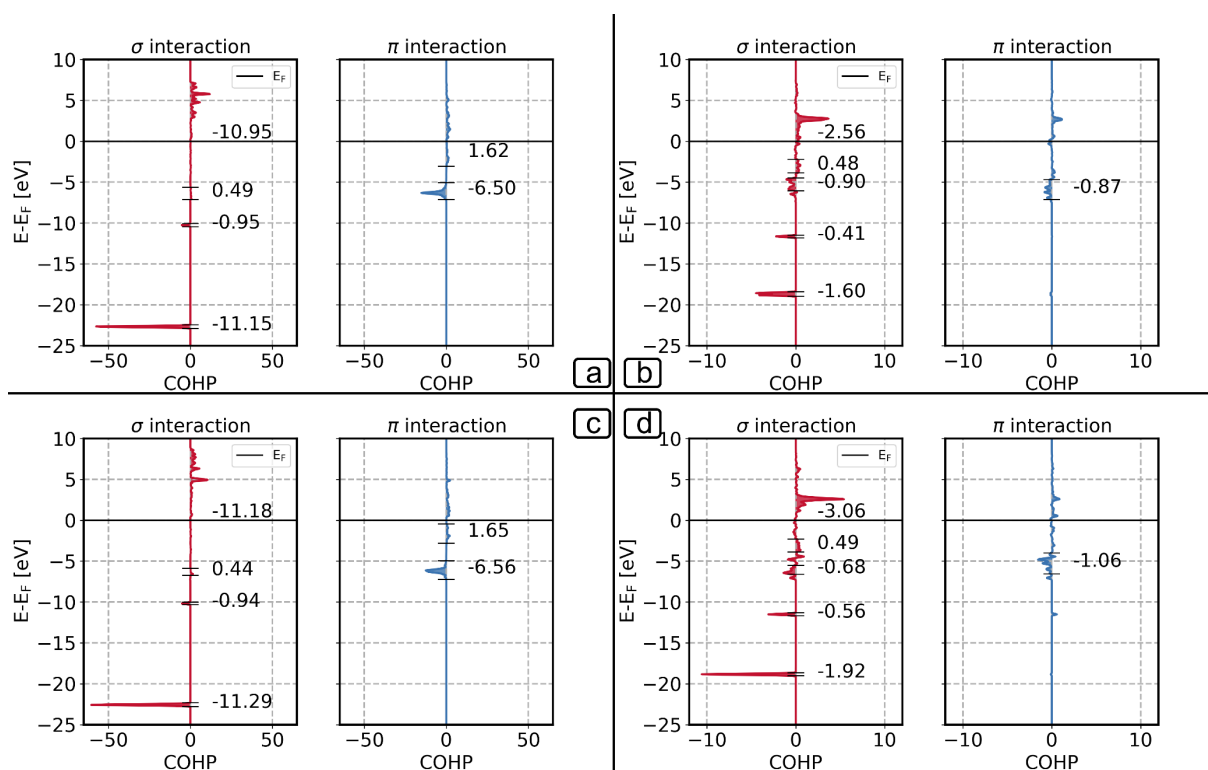

Figure S24. COHP of sigma (red) and pi (blue) orbitals for CO\* dissociation on Ni<sub>8</sub>/TiO<sub>2</sub>-a and Ni<sub>8</sub>/TiO<sub>2</sub>-r. (a) IS on Ni<sub>8</sub>/TiO<sub>2</sub>-a; (b): IS on Ni<sub>8</sub>/TiO<sub>2</sub>-r; (c) TS on Ni<sub>8</sub>/TiO<sub>2</sub>-a; (d): TS on Ni<sub>8</sub>/TiO<sub>2</sub>-r.

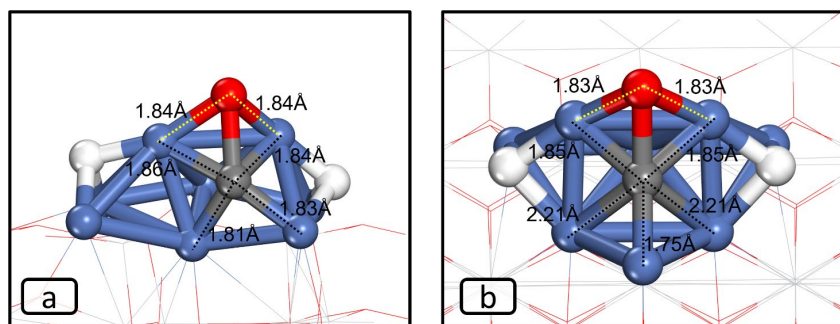

Figure S25. The location of C\* and O\* in the transition of CO\* direct dissociation on (a) Ni<sub>8</sub>/TiO<sub>2</sub>-a and (b) Ni<sub>8</sub>/TiO<sub>2</sub>-r. The TiO<sub>2</sub> supports are depicted with lines to provide a clear visualization of the positions of C\* and O\* species. Color coding: blue: Ni; white: H; red: O; gray: C.

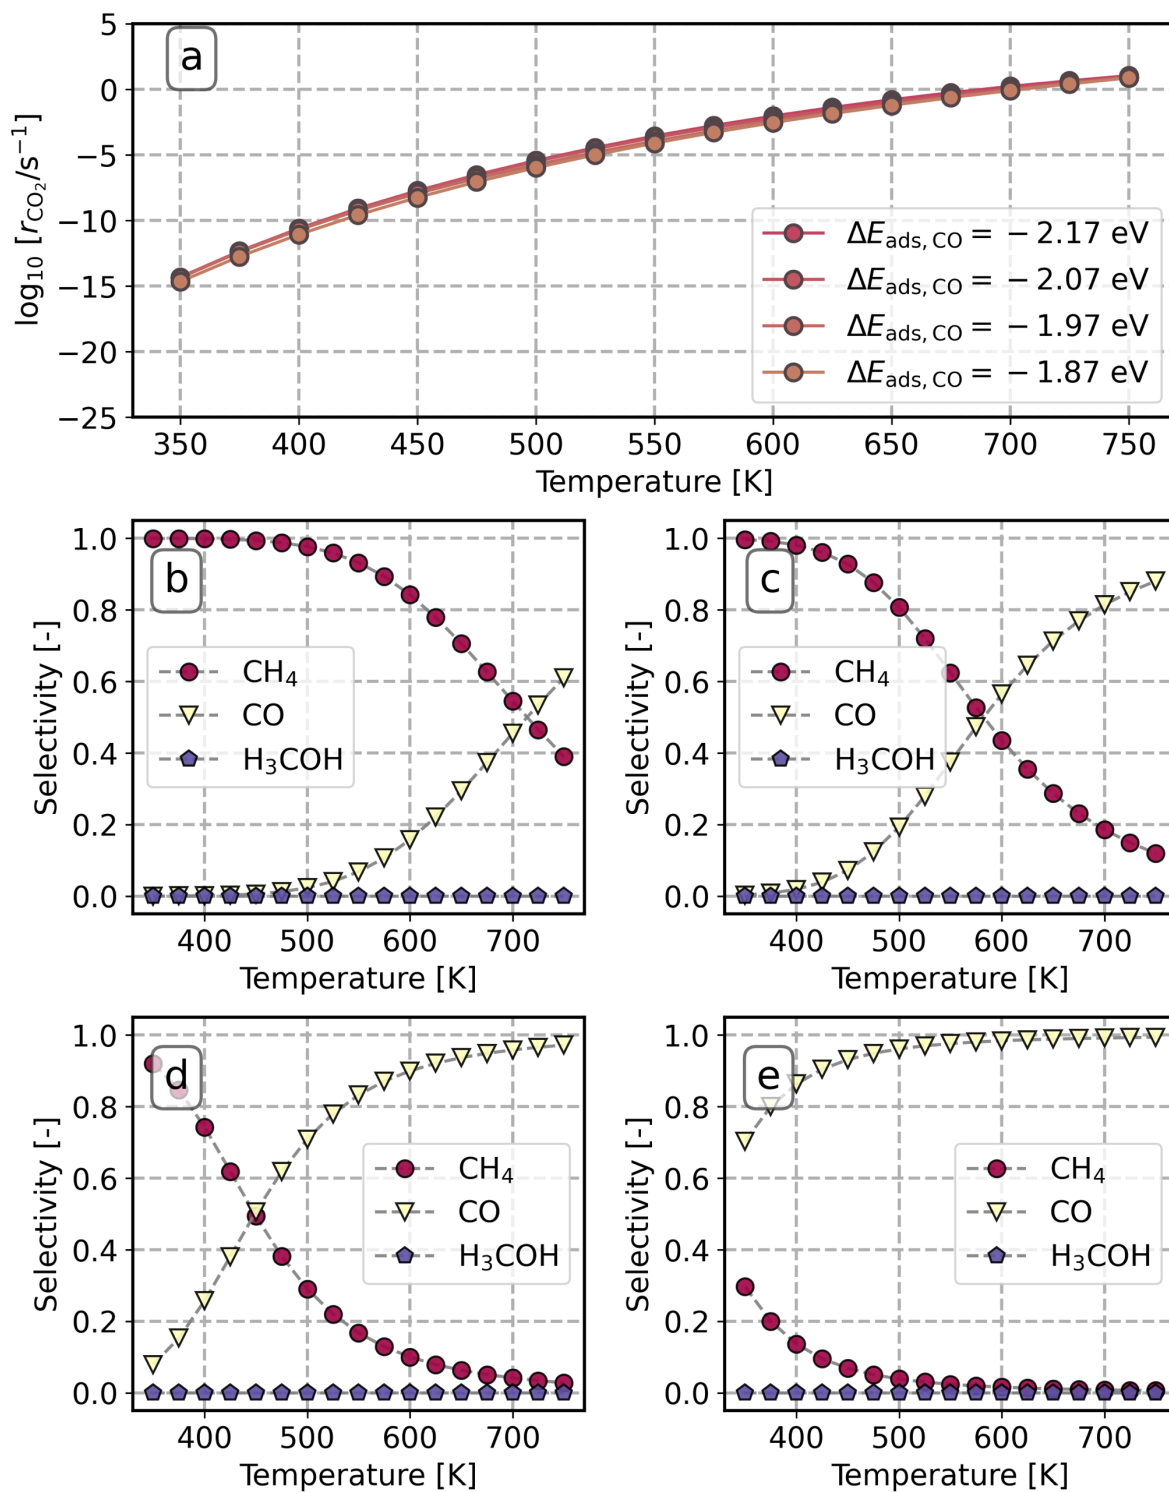

Figure S26. CO<sub>2</sub> reaction rate (a) and product distribution (b-e) as a function of temperature on Ni<sub>8</sub>/TiO<sub>2</sub>-a with varying CO adsorption energy. (b):  $\Delta E_{\text{ads,CO}} = -2.17$  eV; (c):  $\Delta E_{\text{ads,CO}} = -2.07$  eV; (d):  $\Delta E_{\text{ads,CO}} = -1.97$  eV; (e):  $\Delta E_{\text{ads,CO}} = -1.87$  eV.

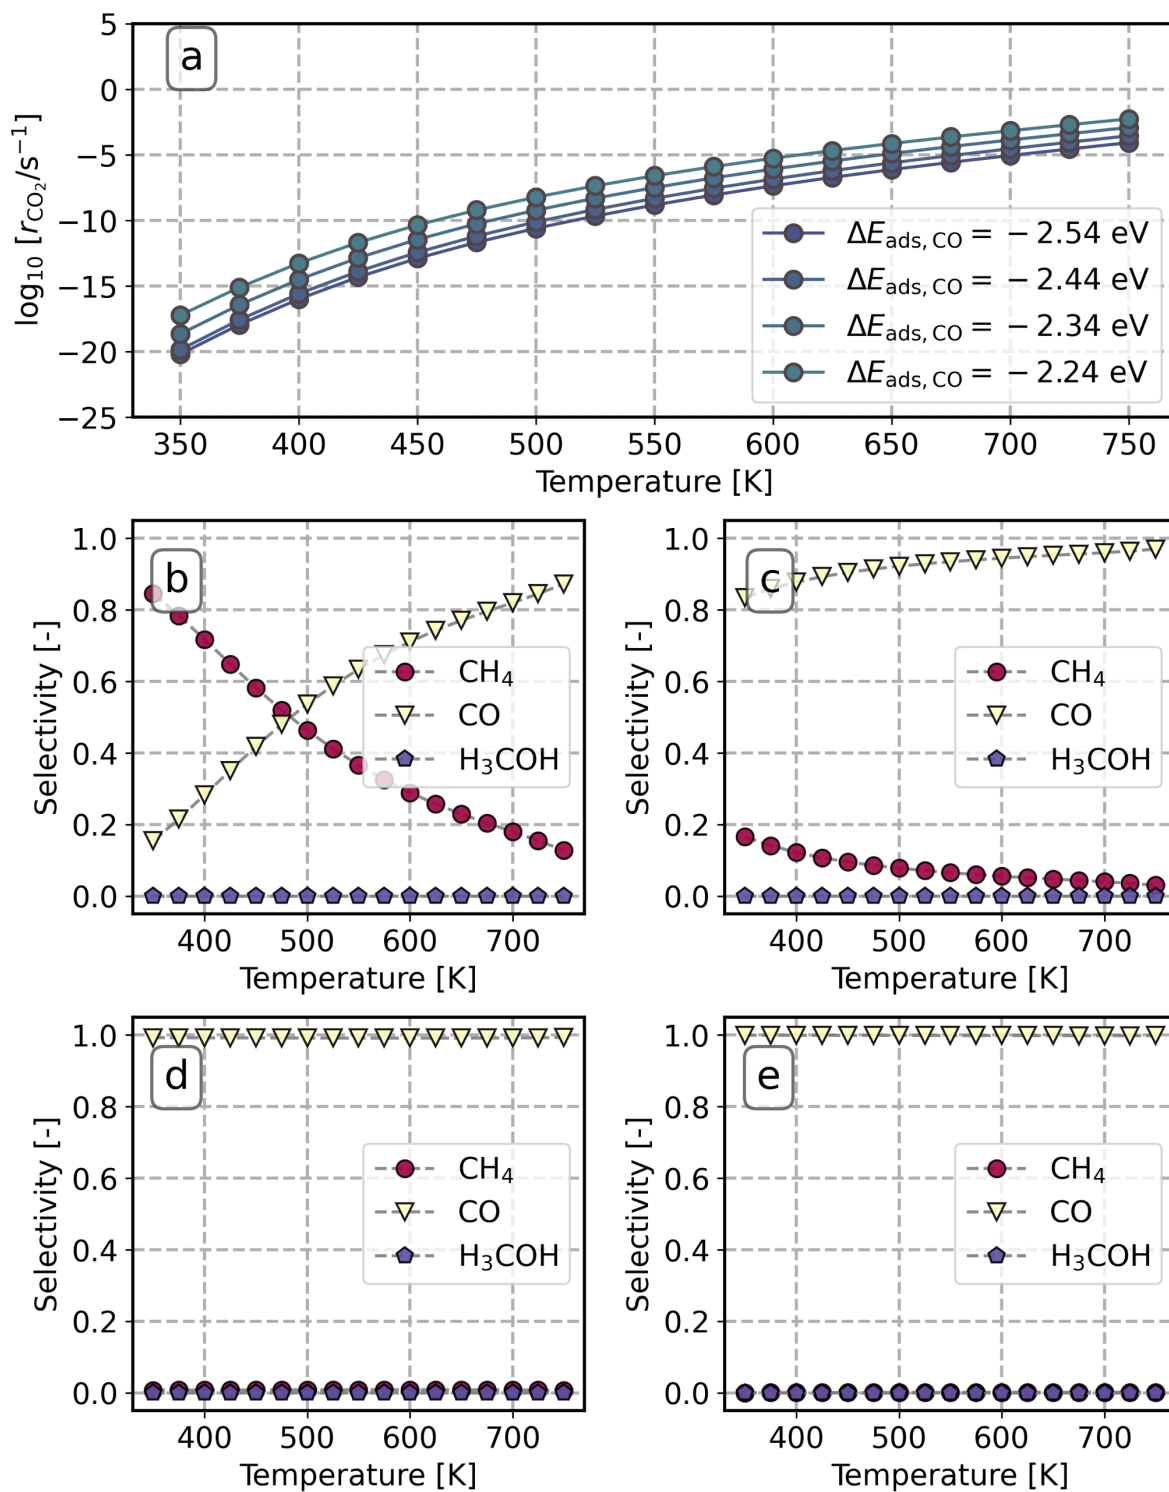

Figure S27. CO<sub>2</sub> reaction rate (a) and product distribution (b-e) as a function of temperature on Ni<sub>8</sub>/TiO<sub>2</sub>-r with varying CO adsorption energy. (b):  $\Delta E_{\text{ads,CO}} = -2.54$  eV; (c):  $\Delta E_{\text{ads,CO}} = -2.44$  eV; (d):  $\Delta E_{\text{ads,CO}} = -2.34$  eV; (e):  $\Delta E_{\text{ads,CO}} = -2.24$  eV.
